1     **Esterase Activity is Affected by Genetics, Age, Insecticide Exposure, and Viral**  
2                                    **Infection in the Honey Bee, *Apis mellifera***

3

4     Frank D. Rinkevich<sup>1\*</sup>, Joseph W. Margotta<sup>2</sup>, Michael Simone-Finstrom<sup>1</sup>, Lilia I. de  
5                                    Guzman<sup>1</sup>, and Kristen B. Healy<sup>2</sup>

6

7     <sup>1</sup>USDA-ARS Honey Bee Breeding, Genetics, and Physiology Laboratory, Baton  
8     Rouge, LA USA

9

10    <sup>2</sup>Department of Entomology, Life Sciences Annex, Agricultural Center, Louisiana  
11    State University, Baton Rouge, LA USA

12

13    \*Corresponding Author

14    Email [frank.rinkevich@ars.usda.gov](mailto:frank.rinkevich@ars.usda.gov)

## 15 **Abstract**

16 Non-target impacts of insecticide treatments are a major public and  
17 environmental concern, particularly in contemporary beekeeping. Therefore, it is  
18 important to understand the physiological mechanisms contributing to  
19 insecticide sensitivity in honey bees. In the present studies, we sought to evaluate  
20 the role of esterases as the source of variation in insecticide sensitivity. To address  
21 this question, the following objectives were completed: 1) Evaluated esterase  
22 activity among honey bee stocks, 2) Assessed the correlation of esterase activity  
23 with changes in insecticide sensitivity with honey bee age, 3) Established if  
24 esterases can be used as a biomarker of insecticide exposure, and 4) Examined  
25 the effects of Varroa mite infestation and viral infection on esterase activity.

26 Results indicated that honey bees have a dynamic esterase capacity that  
27 is influenced by genetic stock and age. However, there was no consistent  
28 connection of esterase activity with insecticide sensitivity across genetic stocks or  
29 with age, suggests other factors are more critical for determining insecticide  
30 sensitivity. The trend of increased esterase activity with age in honey bees  
31 suggests this physiological transition is consistent with enhanced metabolic rate  
32 with age. The esterase inhibition with naled but not phenothrin or clothianidin  
33 indicates that reduced esterase activity levels may only be reliable for sublethal  
34 doses of organophosphate insecticides. The observation that viral infection, but  
35 not Varroa mite infestation, reduced esterase activity shows viruses have  
36 extensive physiological impacts. Taken together, these data suggest that honey

37 bee esterase activity toward these model substrates may not correlate well with  
38 insecticide sensitivity. Future studies include identification of esterase substrates  
39 and inhibitors that are better surrogates of insecticide detoxification in honey  
40 bees as well as investigation on the usefulness of esterase activity as a biomarker  
41 of pesticide exposure, and viral infection.

## 42 Introduction

43 The history of honey bee kills upon contact with insecticides has been  
44 documented since the advent of modern insecticides [1]. Beekeeper surveys  
45 report that pesticide exposure significantly increases annual colony losses [2].  
46 Considering that a number of insecticides used in agriculture and vector control  
47 exhibit high toxicity to honey bees and that honey bees regularly encounter  
48 numerous of pesticides within the colony [3], potential synergistic interactions  
49 among these pesticides [4] may contribute to poor colony health.

50 Insects possess an array of metabolic mechanisms such as esterases,  
51 cytochrome P450s, and glutathione-S-transferases to detoxify pesticides, plant  
52 allelochemicals, and other xenobiotics [5]. Esterases are a type of hydrolase that  
53 metabolizes compounds by cleaving the ester bonds of a substrate resulting in  
54 separate acid and alcohol products [6]. Quantitative increases [7] as well as  
55 qualitative changes in esterase activity [8] may lead to reduction in insecticide  
56 sensitivity. In honey bees, esterase expression and activity are upregulated in  
57 response to exposure to *p*-coumaric acid [9], coumaphos [10], thiamethoxam  
58 [11], deltamethrin, fipronil, and spinosad [12]. Esterase inhibitors significantly  
59 increase sensitivity to phenothrin [13], tau-fluvalinate, cyfluthrin [14],  
60 fenpyroximate, and thymol [15], suggesting that esterase-mediated  
61 detoxification significantly influences pesticide sensitivity. Therefore,  
62 understanding the factors that affect honey bee esterase activity may yield  
63 insight into differences in insecticide sensitivity.

64 A myriad of factors such as age, diet, and genetics may affect insecticide  
65 sensitivity [13, 16, 17], but little research has been done on the underlying  
66 physiological mechanisms. Therefore, we decided to investigate a number of  
67 common factors that previous work suggests may affect honey bee physiological  
68 processes with a particular focus on esterase activity.

69 The current study aimed to tease apart several factors that influence  
70 insecticide sensitivity and esterase activity in honey bees.

71 1) Esterase comparison among honey bee stocks. Earlier studies  
72 demonstrated that insecticide susceptibility varies among Italian, Russian, and  
73 Carniolan stocks of honey bees, and esterase inhibition has been shown to  
74 increase sensitivity to phenothrin [13]. This led us to hypothesize that esterases may  
75 contribute to variation in insecticide sensitivity among honey bee stocks and  
76 across age.

77 2) Changes in esterase activity with age. Because of changes in pesticide  
78 sensitivity occurring with increased age [13], we assessed esterase activity in  
79 worker bees of different ages to compare if changes in esterase activity  
80 correlated with changes in insecticide sensitivity.

81 3) Esterase inhibition by insecticides. Numerous sublethal effects of  
82 pesticides have been demonstrated [18-20], and esterase activity has been  
83 proposed as a biomarker of high levels of pesticide exposure [11, 12]. Therefore  
84 we assayed the changes of esterase activity upon exposure to experimentally-

85 determined sublethal levels of the insecticides naled, phenothrin, and  
86 clothianidin.

87 4) Impacts of Varroa mite infestation and viruses on esterase activity. All  
88 honey bee colonies in the US are infested with the ectoparasitic mite, *Varroa*  
89  *destructor* (hereto referred to as the Varroa mite). Varroa mites and the  
90 associated viruses they transmit are among the most significant factors relating to  
91 colony failure [21, 22]. These factors were both tested because mite infestation  
92 and viral infection alone and in combination have multifactorial effects on honey  
93 bee physiology and response to insecticide activity [20, 23, 24]. Therefore, the  
94 effects of Varroa mite infestation and viral infection on esterase activity were also  
95 investigated. Results are discussed in terms of how progression through the honey  
96 bee's life history and the impact of biotic factors influence esterase capacity. We  
97 further suggest the notion of developing esterases as a potential biomarker of  
98 insecticide exposure and viral infection.

## 99 **Materials and Methods**

### 100 **Esterase comparison among honey bee stocks**

#### 101 **Esterase Assays**

102       The model substrates for esterase activity (1-naphthyl acetate (1NA), *para*-  
103 nitrophenyl acetate (PNPA)), Fast Blue B, sodium dodecylsulfate, and Bradford  
104 Reagent were obtained from Sigma (St. Louis, MO). 1NA and PNPA were used  
105 because they are model substrates that are representative of general esterase  
106 and cholinesterase activity, respectively [25].

107       Esterase activity was performed according to established protocols  
108 modified for a 96-well plate [26]. Bee abdomens were homogenized with a  
109 disposable pestle in 1 ml of 100 mM sodium phosphate buffer (pH 7.4) in a  
110 microcentrifuge tube. Samples were spun for 10 m at 4°C at 10,000g. The  
111 supernatant was diluted 1:10 in 100 mM sodium phosphate buffer (pH 7.4) for use  
112 in esterase and Bradford assays.

113       For 1NA endpoint assays, 20 ul of homogenate was added to a well of a  
114 96-well plate (model 9017, Corning Life Sciences, Corning NY) in duplicate. Each  
115 well received 200 ul of 0.3 mM 1NA (final concentration, dissolved in 100 mM  
116 sodium phosphate buffer (pH 7.4)). Plates were held at room temperature (RT) for  
117 15 min. Fifty ul of staining solution (0.15 g Fast Blue B dissolved in 15 ml distilled  
118 water and 35 ml of 5% (w/v) sodium dodecylsulfate), and color was allowed to  
119 develop for 5 m at room temperature. Plates were read at 570 nm in a

120 Spectramax 190 with SoftMax Pro 7.0 software (Molecular Devices, Sunnyvale,  
121 CA). Standard curves were run in parallel each day with 2-fold serial dilutions of  
122 1-naphthol.

123 The PNPA kinetic assay [27] was performed with 20  $\mu$ l of enzyme  
124 homogenate added to a 96 well plate in duplicate. Control wells received 20  $\mu$ l  
125 of 100 mM sodium phosphate buffer (pH 7.4). Just prior to the PNPA assay, 0.1 ml  
126 of 100 mM PNPA (dissolved in acetonitrile) was added to 9.9 ml of 50 mM sodium  
127 phosphate buffer (pH 7.4) and vortexed 5 s. Each well received 200  $\mu$ l of the  
128 diluted PNPA solution (1 mM PNPA final concentration), and the changes in  
129 absorbance were immediately read every 10 s for 2 m in a Spectramax 190 at 405  
130 nm. PNPA activity was calculated by subtracting the average control activity  
131 from the experimental samples.

132 Protein concentration was determined by the Bradford method [28] by  
133 placing 10  $\mu$ l of supernatant into a 96 well plate in duplicate. Each well received  
134 200  $\mu$ l of diluted Bradford Reagent (BioRad, Hercules CA), incubated at room  
135 temperature for 5 m, and then absorbance was read in a Spectramax 190 at 595  
136 nm. A standard curve was generated using serial 2-fold dilutions of bovine serum  
137 albumin. Esterase activity towards 1NA and PNPA was standardized by protein  
138 content.

139

140 **Honey bee colonies and collections**



141 Italian, Carniolan, and Russian queens were purchased from commercial  
142 breeders. Colonies were established at the USDA-ARS Honey Bee Breeding,  
143 Genetics, and Physiology Lab in Baton Rouge, LA. All colonies were maintained  
144 using standard management practices with no miticide applications, antibiotic  
145 treatments, or supplemental feeding.

146 Frames of emerging adult worker bees were removed from colonies and  
147 held at  $33\pm 1^\circ\text{C}$ ,  $70\pm 5\%$  RH in continuous darkness overnight. Newly emerged adult  
148 bees were sorted into groups of 20 in 475 ml wax paper cups and supplied with  
149 cotton balls soaked with 50% sucrose solution (w/v). These bees were held at the  
150 environmental conditions listed above until 3-days of age and then frozen at -  
151  $80^\circ\text{C}$  until further use in esterase assays described above. A total of 30 bees (5  
152 individuals from 6 colonies) for each of the 3 honey bee stocks were used in  
153 esterase assays. Esterase activity levels between stocks were compared with  
154 Wilcoxon-Rank Sum test with post-hoc multiple comparisons test ( $\alpha=0.05$ ) using  
155 JMP (SAS, Cary, NC).

156

## 157 **Changes in esterase activity with age**

### 158 **Colonies with normal demographics**

159 Brood frames were removed from 6 colonies of Italian honey bees each  
160 consisting of 2 deep boxes with brood frames and 1 medium honey super with  
161  $>30,000$  worker bees. Adults were allowed to emerge overnight from brood  
162 frames, marked with a dot of enamel paint on the notum, and returned to their

163 respective colonies. Marked bees were collected either from inside the hive or  
164 returning from a flight every 3 to 5 days up to 31-days of age. At least 5 bees were  
165 collected each sampling date from each colony. Samples were frozen at -80°C  
166 until used in esterase assays described above. The correlation of age and  
167 esterase activity was compared with Spearman's Rank Correlation using JMP.

168

### 169 **Correlation of esterase activity with changes in insecticide sensitivity** 170 **with age**

171 Newly emerged adult bees were marked with enamel paint and returned  
172 to source colonies as described above. A total of 10 source colonies were used.  
173 Bees were collected at 3-, 14-, 21-, and 28-days of age in groups of 10 into wax  
174 paper cups covered with nylon tulle secured with a rubber band. Topical  
175 bioassays with phenothrin (98.4% purity, ChemService, West Chester PA) and  
176 naled (99.0% purity) were performed as previously described [13]. Bees were  
177 anaesthetized with CO<sub>2</sub> for <30s and a 1 ul drop of insecticide was applied to the  
178 notum with a Hamilton repeating syringe. Control bees were treated with  
179 acetone. Treated bees were provided a cotton ball soaked with 50% sucrose  
180 solution and held in an incubator under the environmental conditions listed  
181 above. At least 1 rep at each dose was used from each colony on each  
182 collection day. A subsample of 8 bees was collected at each collection date and  
183 stored at -80°C until used in esterase assays described above. The LC<sub>50</sub> was  
184 calculated using Probit analysis with Abbott's correction for control mortality [29]

185 in Minitab (State College, PA) and expressed in units of ug insecticide/bee. The  
186 correlation of esterase activity with age and insecticide sensitivity was compared  
187 with Spearman's Rank Correlation using JMP.

188

## 189 **Insecticide inhibition of esterase activity**

### 190 **Clothianidin bioassay**

191 Clothianidin is a neonicotinoid insecticide that is widely used as a seed  
192 treatment for corn and soy beans. It is frequently found in honey bee colonies  
193 and may have detrimental impacts on honey bees [30, 31]. The LC<sub>50</sub> for  
194 clothianidin (99.5% purity, ChemService, West Chester PA) was determined by a  
195 feeding bioassay according to previously published methods [13]. Newly  
196 emerged adult Italian honey bees from 3 colonies were sorted into groups of 20  
197 in 475 ml wax paper cups and held at 33±1°C with 70±5% RH in continuous  
198 darkness until 3-days of age. Bees were fed 50% sucrose solution (w/v) containing  
199 concentrations of clothianidin that produced >1% and <99% mortality *ad libitum*  
200 through a perforated microcentrifuge tube. Mortality was recorded after 24 h. The  
201 LC<sub>50</sub> was calculated using Probit analysis with Abbott's correction for control  
202 mortality [29] in Minitab (State College, PA) and expressed in units of ng  
203 clothianidin/ml.

204

### 205 ***In vivo* esterase inhibition**

206 Newly emerged adult Italian honey bees from 6 colonies were collected  
207 and aged to 3-days of age as described above. An experimentally-determined  
208 maximum-sublethal treatment of phenothrin (0.1 ug/bee, topical [13]), naled  
209 (0.066 ug/bee, topical [13]), or clothianidin (2.15 ng/ml, feeding, from above  
210 experiment) was administered to these bees. To determine the dose-  
211 dependence of esterase inhibition, sublethal doses of naled (i.e., 0.05, 0.033, and  
212 0.025 ug/bee) were applied to 3-day old bees in a separate experiment. Control  
213 bees were treated with 1 ul of acetone for control topical bioassays or 50%  
214 sucrose solution with 0.001% acetone for feeding bioassays. Bees were collected  
215 at 24 hours after treatment and frozen at -80°C until use in esterase assays  
216 described above. Esterase activity data from insecticide exposed bees were  
217 compared with Wilcoxon-Rank Sum Test with post-hoc multiple comparisons test  
218 ( $\alpha=0.05$ ) using JMP. The correlation of naled doses and esterase activity was  
219 compared with Spearman's Rank Correlation using JMP.

220

## 221 **Impacts of Varroa mite and virus on esterase activity**

### 222 **Varroa mite infestation**

223 Frames of emerging adults were removed from 4 colonies of Italian bees  
224 that showed no symptoms of viral infection. Emerging adults and the associated  
225 brood cells from which they emerged were examined for Varroa mite infestation  
226 by a single foundress [32]. Varroa mite infested and uninfested adults were  
227 collected into separate wax paper cups provisioned with a cotton ball saturated

228 with 50% sucrose solution. These bees were held in an incubator at  $33\pm 1^{\circ}\text{C}$  with  
229  $70\pm 5\%$  RH in continuous darkness until 3-days of age, then stored at  $-80^{\circ}\text{C}$  until  
230 used in esterase assays as described above. Esterase activity from Varroa mite  
231 infested bees was compared with Wilcoxon-Rank Sum Test using JMP.

232

## 233 **Virus injection**

234 Solutions of *Deformed wing virus* (DWV), *Chronic bee paralysis virus* (CBPV),  
235 and *Black queen cell virus* (BQCV) were semi-purified by grinding 10 symptomatic  
236 adult bees (DWV, CBPV) or larvae (BQCV) in phosphate buffered saline (PBS) and  
237 centrifuged in a 15 mL tube at 4,700g for 20 m at  $4^{\circ}\text{C}$ . The supernatant was then  
238 filtered through a 0.2  $\mu\text{m}$  syringe filter and maintained at until  $4^{\circ}\text{C}$  use within a  
239 week following standard protocols [33]. Viral titers were determined using  
240 standard curves generated from plasmid standards containing the sequence  
241 listed above (generated by GeneArt, Invitrogen). Linearized plasmid standards  
242 containing  $10^5$  to  $10^{12}$  copies per reaction were used as templates to assess primer  
243 efficiency and quantify the amount of virus following standard practices [34-36].  
244 Linear standard equations were generated using the  $\log_{10}$  of the initial plasmid  
245 copy number. The genomic region encoding a capsid protein for each of the  
246 viruses was as follows: DWV Forward— GAG ATT GAA GCG CAT GAA CA and  
247 Reverse— TGA ATT CAG TGT CGC CCA TA (AY292384.1, [37]); CBPV Forward—  
248 CGC AAG TAC GCC TTG ATA AAG AAC and Reverse—ACT ACT AGA AAC TCG

249 TCG CTT CG (EU122229.1, [38]); BQCV Forward—TTT AGA GCG AAT TCG GAA  
250 ACA and Reverse— GGC GTA CCG ATA AAG ATG GA (HQ655494.1, [37]).

251 Newly emerged adult bees (<1 h) from 3 colonies were collected into a 20  
252 ml scintillation vial and chilled on ice. Bees were injected between the dorsal  
253 abdominal tergites with 3 ul of semi-purified virus (DWV @  $10^7$  copies/ul; CBPV @  
254  $10^4$  copies/ul; BQCV @  $10^7$  copies/ul) using a Hamilton syringe fitted with a 30G  
255 needle at an infusion rate of 1ul/sec using a Micro4™ Microsyringe Pump  
256 Controller adapted from standard methods [33, 39]. Two sets of control bees were  
257 either uninjected or injected with PBS. Adults were collected in to a wax paper  
258 cup provisioned with a cotton ball with 50% sucrose solution and held in an  
259 incubator at  $33 \pm 1^\circ\text{C}$  with  $70 \pm 5\%$  RH in continuous darkness until 3-days of age.  
260 Survivors were collected and stored at  $-80^\circ\text{C}$  until used in esterase assays as  
261 described above. Esterase activity in virus-injected bees was compared via One-  
262 Way ANOVA with Tukey's HSD post-hoc test using JMP.

## 263 **Results**

### 264 **Esterase activity varies among honey bee stocks**

265 Carniolan and Italian honey bees exhibited significantly higher esterase  
266 activity towards 1NA ( $\chi^2=10.4$ ,  $df=2$ ,  $p<0.01$ , Fig 1) compared to Russian honey  
267 bees. Italian honey bees showed significantly higher esterase activity towards  
268 PNPA compared to both Carniolan and Russian honey bees, and Carniolan  
269 honey bees had significantly higher activity compared to Russian honey bees  
270 ( $\chi^2=17.5$ ,  $df=2$ ,  $p<0.01$ , Fig 1).

271  
272 **Fig 1. Esterase activity towards 1NA and PNPA from Carniolan, Italian, and**  
273 **Russian honey bees.** The bar with an \* indicate significant differences between  
274 stocks. Data are the average  $\pm$  SEM.  
275

### 276 **Changes in esterase activity with age**

#### 277 **Esterase activity positively correlates with honey bee age**

278 Esterase activity towards both 1NA and PNPA was significantly correlated  
279 with age in honey bees in colonies with normal demographics (1NA  $\rho=0.86$ ,  $df=13$   
280  $p<0.01$ , Fig 2A; PNPA  $\rho=0.91$ ,  $df=13$ ,  $p<0.01$ , Fig 2B).

281  
282 **Fig 2. Changes in esterase activity with age.** Esterase activity towards 1NA (A) and  
283 PNPA (B) significantly increased with age. Data are the average  $\pm$  SEM.  
284

285 **Changes in insecticide sensitivity with honey bee age do not correlate**  
286 **with esterase activity**

287           Sensitivity to phenothrin did not significantly decrease with age in honey  
288 bees from colonies with normal demographics ( $\rho=0.80$ ,  $df=3$ ,  $p=0.20$ ; Fig 3A), but  
289 older bees (i.e. 21- and 28-day old bees) were significantly less sensitive to  
290 phenothrin than younger bees (i.e. 3- and 14-day old bees). Naled sensitivity  
291 significantly increased with age in honey bees from colonies with normal  
292 demographics ( $\rho=-1.00$ ,  $df=3$ ,  $p<0.01$ ; Fig 3B). Phenothrin sensitivity did not  
293 correlate with esterase activity towards 1NA ( $\rho=0.00$ ,  $df=3$ ,  $p=1.0$ ; Fig 4A) or PNPA  
294 ( $\rho=0.80$ ,  $df=3$ ,  $p=0.20$ ; Fig 4C). There was a significant negative correlation of  
295 naled sensitivity with esterase activity towards PNPA ( $\rho=-1.00$ ,  $df=3$ ,  $p=<0.01$  Fig  
296 4D), but not 1NA ( $\rho=-0.40$ ,  $df=3$ ,  $p=0.60$  Fig 4B)

297

298 **Fig 3. Changes in insecticide sensitivity with age in honey bees from colonies**  
299 **with normal demographics.** Sensitivity to phenothrin decreased with age (A),  
300 while sensitivity to naled increased with age (B). Letters indicate significant  
301 differences in insecticide sensitivity at different ages. Data are the average  $\pm$   
302 95% CI.

303

304

305 **Fig 4. Correlation of esterase activity and insecticide sensitivity.** Esterase activity  
306 towards 1NA was not correlated with sensitivity to phenothrin (A) or naled (B).  
307 There was no correlation of esterase activity towards PNPA and phenothrin  
308 sensitivity (C), but it was significantly correlated with naled sensitivity (D). Data  
309 are shown as the  $LD_{50} \pm 95\%CI$ .

310

311 ***In vivo* esterase inhibition by insecticides**

312 **Determination of maximum sublethal clothianidin concentration**



313 The LC<sub>50</sub> for clothianidin was 132.6 ng/ml (Table 1). The ratio of the LC<sub>90</sub> to  
314 LC<sub>10</sub> was 92-fold. Based upon these results, the maximum sublethal clothianidin  
315 concentration was calculated to be 2.1 ng/ml and verified by bioassays.

316 **Table 1. Clothianidin toxicity to Italian honey bees.** The LC values are expressed in  
317 ng clothianidin/ml sucrose solution. Values in parenthesis represent the 95%  
318 confidence interval and standard error for the LC values and slope, respectively.  
319

| Compound     | n    | LC <sub>10</sub> | LC <sub>50</sub>    | LC <sub>90</sub>      | Slope     |
|--------------|------|------------------|---------------------|-----------------------|-----------|
| Clothianidin | 1052 | 13.8 (6.9-22.5)  | 132.6 (103.9-160.3) | 1276.2 (986.4-1813.2) | 1.3+(0.1) |

320

### 321 **Sublethal insecticide exposure in vivo esterase inhibition varies with** 322 **insecticide class**

323 Both 1NA and PNPA activities were significantly inhibited by application of  
324 sublethal dose of naled (1NA Z=-3.03, p<0.01; PNPA Z=-6.05, p<0.01, Fig 5).  
325 Exposure to sublethal treatments of phenothrin or clothianidin did not significantly  
326 affect 1NA or PNPA activity 24 hours post treatment (Fig 5). Further application of  
327 lower sublethal doses of naled resulted in dose-dependent inhibition of 1NA ( $\rho=-$   
328 0.82, df=7, p=0.02) and PNPA activity ( $\rho=-0.75$ , df=7, p=0.05, Fig 6). Inhibition of  
329 PNPA activity was greater than inhibition of 1NA activity at 0.05 ug/bee ( $\chi^2=12.5$ ,  
330 df=1, p<0.01) and 0.066 ug/bee ( $\chi^2=13.6$ , df=1, p<0.01; Fig 6).

331

332 **Fig 5. Effect of sublethal treatments of insecticides on esterase activity.** Capital  
333 and lower case letters indicate significant differences in 1NA and PNPA activity,  
334 respectively

335 **Fig 6. Relative inhibition of esterase activity towards 1NA and PNPA to sublethal**  
336 **doses of naled.** Capital and lower case letters indicate significant differences in  
337 1NA and PNPA activity, respectively. The asterisk indicate significant differences  
338 between substrates at respective naled doses.  
339

## 340 **Viruses but not Varroa affect esterase activity**

### 341 **Varroa mite infestation does not affect esterase activity**

342 Esterase activity towards 1NA ( $\chi^2=0.30$ ,  $df=1$ ,  $p=0.58$ , Fig 7) or PNPA ( $\chi^2=0.28$ ,  
343  $df=1$ ,  $p=0.59$ , Fig 7) was not affected by Varroa mite infestation, as honey bee  
344 that pupated with a single Varroa mite feeding on them exhibited no differences  
345 in esterase activity compared to bees that developed without Varroa infestation.  
346

347 **Fig 7. Varroa mite infestation does not affect esterase activity towards 1NA or**  
348 **PNPA.** Data are shown as average  $\pm$  SEM.  
349

### 350 **Viral infection reduces esterase activity**

351 Esterase activity towards 1NA significantly decreased in bees injected with  
352 BQCV, CBPV, and DWV relative to both uninjected and PBS-injected controls  
353 ( $F=18.8$ ,  $df=12$ ,  $p<0.01$ , Fig 8). PNPA activity was significantly reduced in bees  
354 injected with BQCV and CBPV compared to both uninjected and PBS-injected  
355 controls. DWV-injected bees had lower PNPA activity compared to uninjected  
356 controls ( $F=19.7$ ,  $df=12$ ,  $p<0.01$ , Fig 8).

357 **Fig 8. Viruses reduce esterase activity.** Honey bees injected with BQCV ( $n=12$ ),  
358 CVPV ( $n=16$ ) or DWV ( $n=16$ ) have significantly reduced esterase activity relative  
359 to uninjected ( $n=16$ ) or PBS-injected controls ( $n=12$ ). Capital and lower case  
360 letters indicate significant differences in esterase activity towards 1NA and PNPA,  
361 respectively. Data are the average  $\pm$  SEM.

## 362 **Discussion**

363           Our research shows plasticity in honey bee esterase activity due to a wide  
364 variety of life-history traits and external pressures. These physiological differences  
365 may underlie the wide range in the reports of honey bee pesticide sensitivity [16,  
366 17] as well as emphasizing the need for detailed descriptions of the insecticide  
367 bioassay conditions in order to produce data that is comparable among  
368 researchers. The results we report on factors affecting esterase activity in honey  
369 bees are concepts that are easily applicable to other physiological systems such  
370 as immune function, nutrition utilization, and development where experimental  
371 conditions may dramatically affect the results. Honey bee colonies are complex  
372 and dynamic systems that are highly adaptable to changes in foraging resources,  
373 pathogen infection, parasite infestation, and pesticide exposure in particular.  
374 Understanding the physiological basis of how honey bees mediate these stresses  
375 allows for improved colony management strategies to promote honey bee  
376 colony health.

377

### 378 **Esterase activity does not correlate with insecticide sensitivity**

379           We utilized 1NA and PNPA because they are model substrates that are  
380 indicative of general esterase and choline esterase activity, respectively [25, 40].  
381 However, esterase activity towards the model substrates 1NA and PNPA may not  
382 reliable surrogates of esterase activity towards most insecticides in honey bee. It

383 is possible that the activity of esterases capable of detoxifying organophosphates  
384 (OPs) cannot be assessed using the model substrates we employed. For example,  
385 a mutation in the E3 esterase of OP resistant strains of the sheep blowfly confers  
386 hydrolase activity towards the OP chlorfenvinphos while losing the ability to  
387 metabolize the model substrates 1NA and PNPA [8]. The difficulties of connecting  
388 insecticide sensitivity and esterase activity towards model substrates has been  
389 especially noted in OP resistant mosquitoes [41-43]. Thus, identification of honey  
390 bee-specific esterase substrates (including the insecticide itself) and inhibitors are  
391 urgently needed to accurately assess the metabolic contribution of esterases  
392 toward insecticide sensitivity.

393         The high esterase activity in Italian honey bees was an unexpected result  
394 since this stock of honey bees was the most sensitive to many insecticides and  
395 esterase inhibition produced the lowest level of synergism in phenothrin bioassays  
396 [13]. Comparison of esterase activity generated here with previously reported  
397 LD<sub>50</sub>/LC<sub>50</sub> values among honey bee stocks [13] suggest variable roles for esterases  
398 in insecticide sensitivity. Although data points were limited in our previous study  
399 (and thus unable to be statistically analyzed appropriately), there was a positive  
400 association of esterase activity towards 1NA and PNPA with the LD<sub>50</sub> of malathion  
401 among honey bee stocks. This is consistent with esterase-mediated detoxification  
402 of malathion [44]. There was no correlation with esterase activity towards 1NA and  
403 PNPA with the LD<sub>50</sub> values of naled, etofenprox, resmethrin, or imidacloprid [13],  
404 suggesting other factors besides esterases are more important for explaining

405 differential sensitivity to these insecticides among these honey bee stocks [45, 46].  
406 Interestingly, esterase activity negatively correlated with the LD<sub>50</sub>s of phenothrin  
407 and thiamethoxam [13], suggesting that esterases may bioactivate these  
408 compounds to more toxic metabolites. However, the role of esterases in  
409 bioactivation of these compounds would be unusual as esterases are likely  
410 responsible for phenothrin detoxification [47], and P450s are responsible for  
411 bioactivation of thiamethoxam [48].

412         Comparison of the levels of esterase inhibition suggests a secondary role of  
413 esterases in determining phenothrin sensitivity. Italian honey bees had the highest  
414 levels of esterase activity towards PNPA but the lowest of level of synergism in  
415 phenothrin bioassays when the maximum sublethal dose of coumaphos was used  
416 to inhibit esterase activity [13]. However, this assumes that coumaphos provided  
417 similar levels of esterase inhibition among honey bee stocks and that coumaphos  
418 inhibits the esterases that are involved in phenothrin detoxification. Future studies  
419 on esterase inhibition with different inhibitors will help determine the types of  
420 esterase that contribute to activity towards these substrates and if there is any  
421 differences in the effectiveness of these inhibitors among honey bee stocks.

422         A third line of evidence that suggests a diminished role of esterases in  
423 insecticide detoxification is shown in the current study with the lack of correlation  
424 of esterase activity with phenothrin sensitivity and the negative correlation with  
425 nated sensitivity as bees aged. While esterases are important for phenothrin  
426 sensitivity in 3-day old bees [13, 14], the lack of correlation of esterase activity and

427 phenothrin sensitivity with age suggests that other factors (i.e. P450s [14, 49]) may  
428 underlie the changes in phenothrin sensitivity with age. The negative association  
429 of esterase activity with naled sensitivity suggests esterase activity bioactivated  
430 naled. Bioactivation of OPs is typically accomplished via P450-mediated  
431 conversion of a thiophosphate to the active oxon species [50]. However, naled  
432 does not possess a thiophosphate. Therefore, bioactivation of naled by esterases  
433 is very unlikely due to its chemical structure. These results suggest that other factors  
434 besides esterases are important for determining the increased naled sensitivity  
435 with age in honey bees. Taken together, findings from current and previous work  
436 suggest that esterases activity as measured by metabolism of model substrates  
437 may play a secondary role in determining pesticide sensitivity [14].

438

### 439 **Esterase activity increases with honey bee age**

440 Our results show that esterase activity increases with age in honey bees. This  
441 is consistent with the increase in cytochrome P450 and glutathione-S-transferase  
442 activities with age documented in honey bees [49, 51]. Sensitivity decreases to  
443 the pyrethroid, phenothrin, with age, while sensitivity increases to the OP, naled  
444 (Fig 3; [13]). Both P450s and esterases are involved in determining phenothrin  
445 sensitivity [13]. However, the lack of correlation of esterase activity with phenothrin  
446 sensitivity suggests that other factors, such as P450s, may be more important than  
447 esterases for causing the changes in phenothrin sensitivity with age. The increase

448 in naled sensitivity with age is contradicted by the increase in esterase activity  
449 with age.

450 Previous work that showed that decrease in phenothrin sensitivity and an  
451 increase in naled sensitivity as honey bees aged in single cohort colonies, which  
452 are comprised of bees that are of the same chronological age but shift  
453 physiologically to conduct the different tasks needed for a functioning hive that  
454 would typically be divided across bee ages (e.g. feeding larvae vs. foraging) [13].  
455 Those results are consistent with the results reported here for colonies with normal  
456 demographics (Fig 3). The similar changes in esterase activity and insecticide  
457 sensitivity with age in both types of colonies suggest that altered colony  
458 demographics do not affect insecticide sensitivity under our experimental  
459 conditions. It also suggests that chronological age is more significant than task  
460 (e.g. in-hive worker vs. forager) in determining sensitivity to insecticides, which is  
461 significant for toxicological bioassays.

462

## 463 **Esterase inhibition by insecticides**

### 464 **Clothianidin sensitivity**

465 The  $LC_{50}$  value for clothianidin obtained with Italian honey bees was the  
466 same as the  $LC_{50}$  values for thiamethoxam reported in previous studies [13, 52].  
467 Thiamethoxam must be bioactivated by cytochrome P450s [48] into clothianidin  
468 [53]. The similar  $LC_{50}$  values for thiamethoxam and clothianidin suggest that honey  
469 bees have a high metabolic capacity for this particular bioactivation. However,

470 this phenomenon appears to be a common process as many other insects also  
471 possess similar LC<sub>50</sub> values for thiamethoxam and clothianidin [53-57].

472

### 473 **Esterase inhibition is insecticide-dependent**

474 The patterns of esterase inhibition by exposure to insecticides were  
475 expected based on their respective target sites. Naled is an OP that inhibits  
476 acetylcholinesterase activity, and most honey bee esterase activity is performed  
477 by choline esterases [40], therefore, it is not surprising naled inhibits esterase  
478 activity towards these model substrates. Since mortality occurs at doses of naled  
479 >0.066 ug/bee, it appears that inhibition of 26% and 42% of esterase activity  
480 towards 1NA and PNPA, respectively, results in mortality. Esterases significantly  
481 influence phenothrin sensitivity [13]. However, at the experimentally determined  
482 sublethal dose, phenothrin did not affect esterase activity towards 1NA or PNPA.  
483 Esterase activity was not affected by clothianidin exposure. This result is expected  
484 because studies on the effects of esterase inhibitors on sensitivity to clothianidin  
485 (or thiamethoxam) in honey bees have not been reported and these compounds  
486 have no ester bonds. Reports in which thiamethoxam (which is bioactivated *in*  
487 *vivo* to clothianidin [53]) has been shown to induce or inhibit esterase activity at  
488 concentrations near the LC<sub>50</sub> [58], or at concentrations lower than the LC<sub>50</sub> that  
489 would still result in low levels of mortality [11]. Our study indicates that esterases  
490 are not significantly inhibited *in vivo* at the much lower experimentally-  
491 determined sublethal concentrations of clothianidin that we employed here.



492 While other studies have shown altered esterase activity to insecticide exposure  
493 at levels higher than the experimentally-determined sublethal levels we used here  
494 [11, 58], it is likely that mortality would be a more definitive and more convenient  
495 measure of insecticide exposure.

496

## 497 **Viruses transmitted by Varroa, but not Varroa infestation,** 498 **impair esterase activity**

499 Varroa infestation during the honey bees' development did not alter  
500 esterase activity when they emerged as adults. Honey bees that have been  
501 infested by Varroa mites have smaller body size [32] and reduced expression of  
502 genes involved in metabolic detoxification [59, 60]. Our results, however, show no  
503 effect of Varroa mite infestation on esterase activity. This is consistent with the lack  
504 of change in insecticide sensitivity with varying Varroa mite infestation at the  
505 colony level [61]. Therefore, it appears that single-foundress Varroa infestation on  
506 its own may have little impact on pesticide sensitivity. However, the significant  
507 reduction in esterase activity by injection of virus shows that Varroa infestation  
508 can indirectly affect esterase activity as a disease vector. It is well known that viral  
509 infection can affect pesticide sensitivity [20, 24], and our results demonstrate that  
510 viruses may have significant effects on detoxification capacity. Future  
511 experiments with varying levels of viruses as well as focused investigation on the

512 expression of genes involved in metabolic detoxification will demonstrate the  
513 impacts of viruses on honey bee health.

514

## 515 **Conclusions**

516 This study demonstrates that honey bee esterase activity is very dynamic  
517 and significantly influenced by honey bee stock, age, insecticide exposure, and  
518 viral infection. Our results suggest a diminished or secondary role of esterases in  
519 determining insecticide sensitivity and that esterase activity toward model  
520 substrates does not accurately represent esterase activity towards insecticides.  
521 However, development of low-cost, high throughput assays using the insecticide  
522 as the esterase substrate would yield unambiguous results on the importance of  
523 esterases in determining insecticide sensitivity. The utility of using esterase activity  
524 towards model substrates as biomarkers of insecticide exposure should be  
525 pursued further and validated in order to be used as an accurate diagnostic tool.  
526 Despite these findings, reducing the quantity of insecticides as well as cautious  
527 and accurate application of insecticides near honey bee colonies as well as in  
528 foraging areas can reduce the potential negative impacts of insecticides on  
529 honey bee colony health. Besides potential effects from insecticides, honey bees  
530 are confronted with the significant and realistic problems of Varroa mites [62],  
531 introduced pathogens [63], loss of foraging area [64], and reduced queen health  
532 [65] and the complex interactions among all of these factors may work in concert  
533 to contribute to poor colony performance and productivity.

## 534 **Acknowledgements**

535           We would like to thank Dave Dodge, Victor Rainey, Phil Tokarz, and Hunter  
536 Martin at USDA-ARS Honey Bee Breeding, Genetics and Physiology Laboratory for  
537 colony set up and maintenance, sample collection, virus purification and  
538 injection. This work was funded by a grant from the US Environmental Protection  
539 Agency (EPA Grant#83558201 to KBH) and the Louisiana State University  
540 Agricultural Center. This manuscript has been approved for publication by the  
541 Director of Louisiana Agricultural Experiment Station as Manuscript No 2016-234-  
542 28544. Mention of trade names or commercial products in this publication is solely  
543 for the purpose of providing specific information and does not imply  
544 recommendation or endorsement by the U.S. Department of Agriculture.

## 545 **References**

- 546
- 547 1. Shaw FR. Bee poisoning: a review of the more important literature. Journal  
548 of Economic Entomology. 1941;34:16-21.
- 549 2. Seitz N, Traynor KS, Steinhauer N, Rennich K, Wilson ME, Ellis JD, et al. A  
550 national survey of managed honey bee 2014–2015 annual colony losses in the  
551 USA. Journal of Apicultural Research. 2015;54(4):292-304.
- 552 3. Mullin CA, Frazier M, Frazier JL, Ashcraft S, Simonds R, vanEngelsdorp D, et  
553 al. High levels of miticides and agrochemicals in North American apiaries:  
554 implications for honey bee health. PLoS ONE. 2010;5:e9754.
- 555 4. Johnson RM, Pollock HS, Berenbaum MR. Synergistic interactions between  
556 in-hive miticides in *Apis mellifera*. Journal of Economic Entomology.  
557 2009;102:474-9.
- 558 5. Li X, Schuler MA, Berenbaum MR. Molecular mechanisms of metabolic  
559 resistance to synthetic and natural xenobiotics. Annual Review of Entomology.  
560 2007;52:231-53.
- 561 6. Oakeshott JG, Claudianos C, Campbell PM, Newcomb RD, Russell RJ.  
562 Biochemical genetics and genomics of insect esterases. In: Gilbert LI, Iatrou K,  
563 Gill SS, editors. Comprehensive Molecular Insect Science. 5. Boston: Elsevier;  
564 2005. p. 309-81.
- 565 7. Bass C, Field LM. Gene amplification and insecticide resistance. Pest  
566 Management Science. 2011;67(8):886-90.
- 567 8. Newcomb RD, Campbell PM, Ollis DL, Cheah E, Russell RJ, Oakeshott JG.  
568 A single amino acid substitution converts a carboxylesterase to an  
569 organophosphorus hydrolase and confers insecticide resistance on a blowfly.  
570 Proceedings of the National Academy of Sciences. 1997;94:7464-8.
- 571 9. Mao W, Schuler MA, Berenbaum MR. Honey constituents up-regulate  
572 detoxification and immunity genes in the western honey bee *Apis mellifera*.  
573 Proceedings of the National Academy of Sciences. 2013;110(22):8842-6.
- 574 10. Schmehl DR, Teal PE, Frazier JL, Grozinger CM. Genomic analysis of the  
575 interaction between pesticide exposure and nutrition in honey bees (*Apis*  
576 *mellifera*). Journal of Insect Physiology. 2014;71:177-90.
- 577 11. Badiou-Beneteau A, Carvalho SM, Brunet JL, Carvalho GA, Bulete A,  
578 Giroud B, et al. Development of biomarkers of exposure to xenobiotics in the

- 579 honey bee *Apis mellifera*: Application to the systemic insecticide thiamethoxam.  
580 Ecotoxicology and Environmental Safety. 2012;81:22-31.
- 581 12. Carvalho SM, Belzunces LP, Carvalho GA, Brunet JL, Badiou-Beneteau A.  
582 Enzymatic biomarkers as tools to assess environmental quality: a case study of  
583 exposure of the honeybee *Apis mellifera* to insecticides. Environmental  
584 Toxicology and Chemistry. 2013;32(9):2117-24.
- 585 13. Rinkevich FD, Margotta JW, Pittman JM, Danka RG, Tarver MR, Ottea JA,  
586 et al. Genetics, synergists, and age affect insecticide sensitivity in the honey  
587 bee, *Apis mellifera*. PLoS One. 2015;10(10):e0139841.
- 588 14. Johnson RM, Wen Z, Schuler MA, Berenbaum MR. Mediation of pyrethroid  
589 insecticide toxicity to honey bees (Hymenoptera: Apidae) by cytochrome P450  
590 monooxygenases. Journal of Economic Entomology. 2006;99:1046-50.
- 591 15. Johnson RM, Dahlgren L, Siegfried BD, Ellis MD. Acaricide, fungicide and  
592 drug interactions in honey bees (*Apis mellifera*). PLoS One. 2013;8(1):e54092.
- 593 16. Poquet Y, Vidau C, Alaux C. Modulation of pesticide response in  
594 honeybees. Apidologie. 2016;47(3):412-26.
- 595 17. Johnson RM. Honey bee toxicology. Annual Review of Entomology.  
596 2015;60.
- 597 18. Henry M, Beguin M, Requier F, Rollin O, Odoux JF, Aupinel P, et al. A  
598 common pesticide decreases foraging success and survival in honey bees.  
599 Science. 2012;336:348-50.
- 600 19. Sandrock C, Tanadini M, Tanadini LG, Fauser-Misslin A, Potts SG. Impact of  
601 chronic neonicotinoid exposure on honeybee colony performance and queen  
602 supersedure. PLoS One. 2014;9(8):e103592.
- 603 20. Doublet V, Labarussias M, Miranda JR, Moritz RF, Paxton RJ. Bees under  
604 stress: sublethal doses of a neonicotinoid pesticide and pathogens interact to  
605 elevate honey bee mortality across the life cycle. Environmental Microbiology.  
606 2015;17(4):969-83.
- 607 21. Le Conte Y, Ellis M, Ritter W. Varroa mites and honey bee health: can  
608 Varroa explain part of the colony losses? Apidologie. 2010;41(3):353-63.
- 609 22. Chen YP, Siede R. Honey bee viruses. Advances in Virus Research.  
610 2007;70:33-80.

- 611 23. Gregory PG, Evans JD, Rinderer T, de Guzman L. Conditional immune-  
612 gene suppression of honeybees parasitized by *Varroa* mites. *Journal of Insect*  
613 *Science*. 2005;5:7-11.
- 614 24. Coulon M, Schurr F, Martel A-C, Cougoule N, Bégaud A, Mangoni P, et al.  
615 Metabolisation of thiamethoxam (a neonicotinoid pesticide) and interaction  
616 with the chronic bee paralysis virus in honeybees. *Pesticide Biochemistry and*  
617 *Physiology*. 2017;144:10-8.
- 618 25. Montella IR, Schama R, Valle D. The classification of esterases: an  
619 important gene family involved in insecticide resistance-A review. *Memorias do*  
620 *Instituto Oswaldo Cruz*. 2012;107(4):437-49.
- 621 26. Gomori G. Histochemistry of human esterases. *Journal of Histochemistry*  
622 *and Cytochemistry*. 1955;3(6):479-84.
- 623 27. Aldridge W. Serum esterases. 1. Two types of esterase (A and B)  
624 hydrolysing p-nitrophenyl acetate, propionate and butyrate, and a method for  
625 their determination. *Biochemical Journal*. 1953;53(1):110.
- 626 28. Bradford MM. A rapid and sensitive method for the quantitation of  
627 microgram quantities of protein utilizing the principle of protein-dye binding.  
628 *Analytical Biochemistry*. 1976;72:248-54.
- 629 29. Abbott WS. A method of computing the effectiveness of an insecticide.  
630 *Journal of Economic Entomology*. 1925;18:265-7.
- 631 30. Woodcock B, Bullock J, Shore R, Heard M, Pereira M, Redhead J, et al.  
632 Country-specific effects of neonicotinoid pesticides on honey bees and wild  
633 bees. *Science*. 2017;356(6345):1393-5.
- 634 31. Long EY, Krupke CH. Non-cultivated plants present a season-long route of  
635 pesticide exposure for honey bees. *Nature Communications*. 2016;7:11629. doi:  
636 10.1038/ncomms11629.
- 637 32. Bowen-Walker PL, Gunn A. The effect of the ectoparasitic mite, *Varroa*  
638  *destructor*, on adult worker honey bee (*Apis mellifera*) emergence weights,  
639 water, protein, carbohydrate, and lipid levels. *Entomologia Experimentalis et*  
640 *Applicata*. 2001;101(3):207-17.
- 641 33. de Miranda JR, Bailey L, Ball BV, Blanchard P, Budge GE, Chejanovsky N,  
642 et al. Standard methods for virus research in *Apis mellifera*. *Journal of Apicultural*  
643 *Research*. 2013;52(4):1-56.

- 644 34. Cavigli I, Daughenbaugh KF, Martin M, Lerch M, Banner K, Garcia E, et al.  
645 Pathogen prevalence and abundance in honey bee colonies involved in  
646 almond pollination. *Apidologie*. 2016;47(2):251-66.
- 647 35. Hou Y, Zhang H, Miranda L, Lin S. Serious overestimation in quantitative  
648 PCR by circular (supercoiled) plasmid standard: microalgal pcna as the model  
649 gene. *PLoS One*. 2010;5(3):e9545.
- 650 36. de Guzman LI, Frake AM, Simone-Finstrom M. Comparative flight activities  
651 and pathogen load of two stocks of honey bees reared in gamma-irradiated  
652 combs. *Insects*. 2017;8(4):127.
- 653 37. Evans JD, Saegerman C, Mullin C, Haubruge E, Nguyen BK, Frazier M, et al.  
654 Colony collapse disorder: a descriptive study. *PloS One*. 2009;4(8):e6481.
- 655 38. Blanchard P, Ribière M, Celle O, Lallemand P, Schurr F, Olivier V, et al.  
656 Evaluation of a real-time two-step RT-PCR assay for quantitation of Chronic bee  
657 paralysis virus (CBPV) genome in experimentally-infected bee tissues and in life  
658 stages of a symptomatic colony. *Journal of Virological Methods*. 2007;141(1):7-  
659 13.
- 660 39. Boncristiani HF, Evans JD, Chen Y, Pettis J, Murphy C, Lopez DL, et al. In  
661 vitro infection of pupae with Israeli acute paralysis virus suggests disturbance of  
662 transcriptional homeostasis in honey bees (*Apis mellifera*). *PLoS One*.  
663 2013;8(9):e73429.
- 664 40. Casida JE. Comparative enzymology of certain insect acetylsterases in  
665 relation to poisoning by organophosphorus insecticides. *Biochemical Journal*.  
666 1955;60(3):487-96.
- 667 41. Montella IR, Martins AJ, Viana-Medeiros PF, Lima JBP, Braga IA, Valle D.  
668 Insecticide resistance mechanisms of Brazilian *Aedes aegypti* populations from  
669 2001 to 2004. *The American Journal of Tropical Medicine and Hygiene*.  
670 2007;77(3):467-77.
- 671 42. Hemingway J. The biochemical nature of malathion resistance in  
672 *Anopheles stephensi* from Pakistan. *Pesticide Biochemistry and Physiology*.  
673 1982;17(2):149-55.
- 674 43. Hemingway J. Malathion carboxylesterase enzymes in *Anopheles*  
675 *arabiensis* from Sudan. *Pesticide Biochemistry and Physiology*. 1985;23(3):309-13.
- 676 44. Plapp FW. Biochemical genetics of insecticide resistance. *Annual Review*  
677 *of Entomology*. 1976;21:179-97.



- 678 45. Nauen R, Strobel J, Tietjen K, Otsu Y, Erdelen C, Elbert A. Aphicidal activity  
679 of imidacloprid against a tobacco feeding strain of *Myzus persicae* (Homoptera:  
680 Aphididae) from Japan closely related to *Myzus nicotianae* and highly resistant  
681 to carbamates and organophosphates. *Bulletin of Entomological Research*.  
682 1996;86(02):165-71.
- 683 46. Yang E, Yang Y, Wu S, Wu Y. Relative contribution of detoxifying enzymes  
684 to pyrethroid resistance in a resistant strain of *Helicoverpa armigera*. *Journal of*  
685 *Applied Entomology*. 2005;129(9-10):521-5.
- 686 47. Casida JE, Ueda K, Gaughan LC, Jao LT, Soderlund DM. Structure-  
687 biodegradability relationships in pyrethroid insecticides. *Archives of*  
688 *Environmental Contamination and Toxicology*. 1975;3(4):491-500.
- 689 48. Honda H, Tomizawa M, Casida JE. Neonicotinoid metabolic activation  
690 and inactivation established with coupled nicotinic receptor-CYP3A4 and -  
691 aldehyde oxidase systems. *Toxicology Letters*. 2006;161:108-14.
- 692 49. Smirle MJ, Winston ML. Detoxifying enzyme activity in worker honey bees:  
693 an adaptation for foraging in contaminated ecosystems. *Canadian Journal of*  
694 *Zoology*. 1988;66:1938-42.
- 695 50. Feyereisen R. Insect P450 enzymes. *Annual Review of Entomology*.  
696 1999;44:507-33.
- 697 51. Gilbert MD, Wilkinson CF. Microsomal oxidases in the honey bee, *Apis*  
698 *mellifera*. *Pesticide Biochemistry and Physiology*. 1973;4:56-66.
- 699 52. Laurino D, Manino A, Patetta A, Parparato M. Toxicity of neonicotinoid  
700 insecticides on different honey bee genotypes. *Bulletin of Insectology*.  
701 2013;66(1):119-26.
- 702 53. Nauen T, Ebbinghaus-Kintscher U, Salgado V, Kausmann M.  
703 Thiamethoxam is a neonicotinoid precursor converted to clothianidin in insects  
704 and plants. *Pesticide Biochemistry and Physiology*. 2003;76:55-69.
- 705 54. van Herk WG, Vernon RS, Tolman JH, Ortiz-Saavedra H. Mortality of a  
706 wireworm, *Agriotes obscurus* (Coleoptera: Elateridae), after topical application  
707 of various insecticides. *Journal of Economic Entomology*. 2008;101(2):375-83.
- 708 55. Herron GA, Wilson LJ. Neonicotinoid resistance in *Aphis gossypii* Glover  
709 (Aphididae: Hemiptera) from Australian cotton. *Australian Journal of*  
710 *Entomology*. 2011;50:93-8.



- 711 56. Wang B, Gao R, Mastro VC, Reardon RC. Toxicity of four systemic  
712 neonicotinoids to adults of *Anoplophora glabripennis* (Coleoptera:  
713 Cerambycidae). *Journal of Economic Entomology*. 2005;98(6):2292-300.
- 714 57. Wallingford AK, Kuhar TP, Schultz PB. Toxicity and field efficacy of four  
715 neonicotinoids on harlequin bug (Hemiptera: Pentatomidae). *Florida*  
716 *Entomologist*. 2012;95(4):1123-6.
- 717 58. Hashimoto JH, Ruvolo-Takasusuki MCC, de Toledo VdAA. Evaluation of the  
718 use of the inhibition esterases activity on *Apis mellifera* as bioindicators of  
719 insecticide thiamethoxam pesticide residues. *Sociobiology*. 2003;42:693-9.
- 720 59. Alaux C, Dantec C, Parrinello H, Le Conte Y. Nutrigenomics in honey bees:  
721 digital gene expression analysis of pollen's nutritive effects on healthy and  
722 varroa-parasitized bees. *BMC Genomics*. 2011;12:496-508.
- 723 60. Navajas M, Migeon A, Alaux C, Martin-Magniette ML, Robinson GE, Evans  
724 JD, et al. Differential gene expression of the honey bee *Apis mellifera* associated  
725 with *Varroa destructor* infection. *BMC Genomics*. 2008;9:301-11.
- 726 61. Rinkevich FD, Danka RG, Healy KB. Influence of varroa mite (*Varroa*  
727 *destructor*) management practices on insecticide sensitivity in the honey bee  
728 (*Apis mellifera*). *Insects*. 2017;8(1):9.
- 729 62. Steinhauer NA, Rennich K, Wilson ME, Caron DM, Lengerich EJ, Pettis J, et  
730 al. A national survey of managed honey bees 2012-2013 annual colony losses in  
731 the USA: Results from the Bee Informed Partnership. *Journal of Apicultural*  
732 *Research*. 2014;53(1):1-18.
- 733 63. Wilfert L, Long G, Leggett H, Schmid-Hempel P, Butlin R, Martin S, et al.  
734 Deformed wing virus is a recent global epidemic in honeybees driven by *Varroa*  
735 mites. *Science*. 2016;351(6273):594-7.
- 736 64. Smart M, Pettis J, Rice N, Browning Z, Spivak M. Linking measures of colony  
737 and individual honey bee health to survival among apiaries exposed to varying  
738 agricultural land use. *PLoS One*. 2016;11(3):e0152685.
- 739 65. Pettis JS, Rice N, Joselow K, Chaimanee V. Colony failure linked to low  
740 sperm viability in honey bee (*Apis mellifera*) queens and an exploration of  
741 potential causative factors. *PLoS One*. 2016;11(2):e0147220.  
742

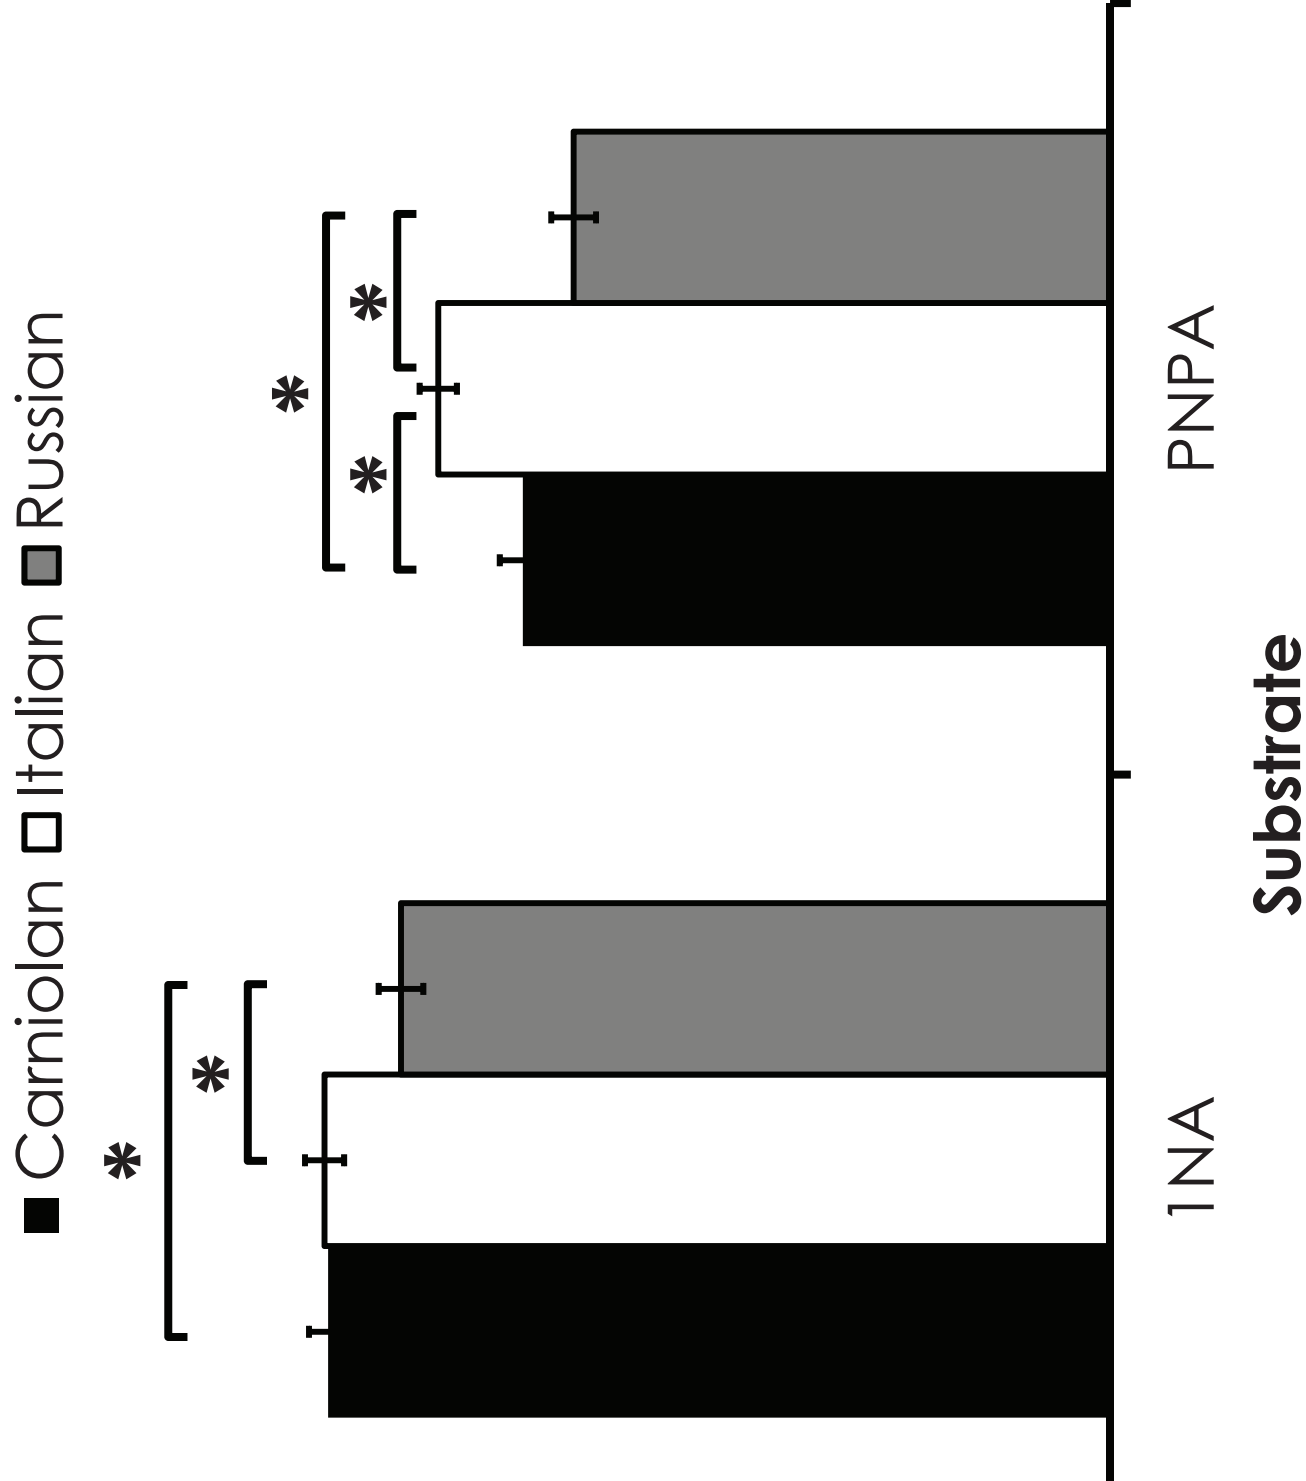

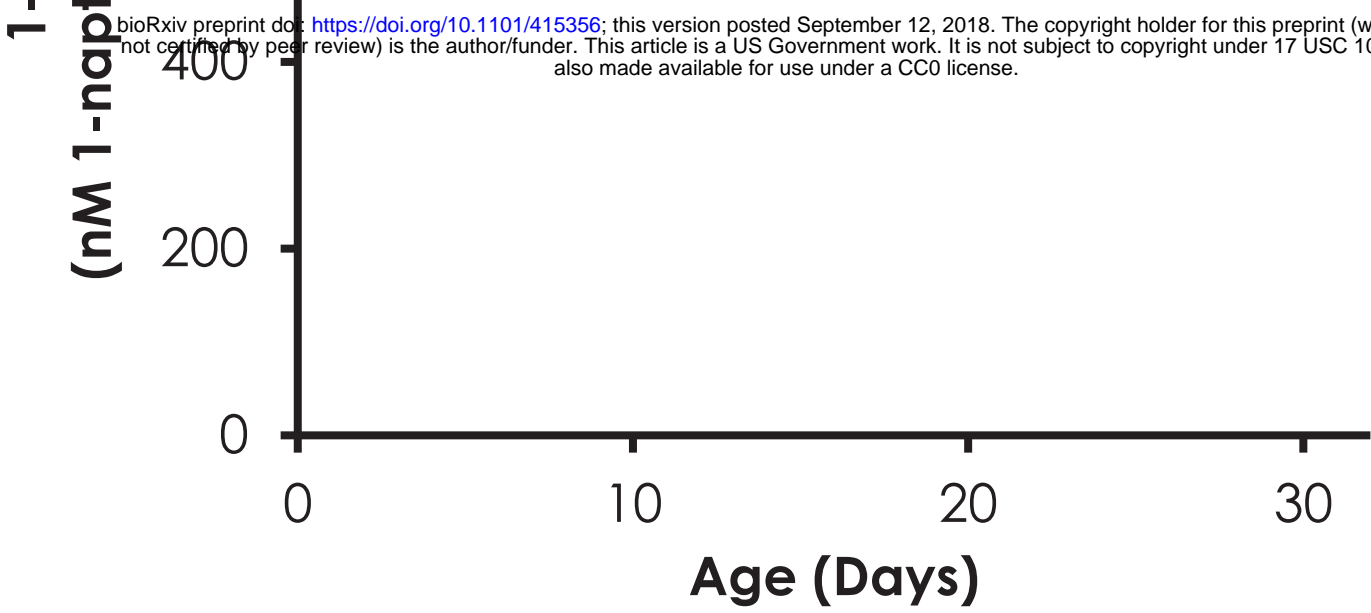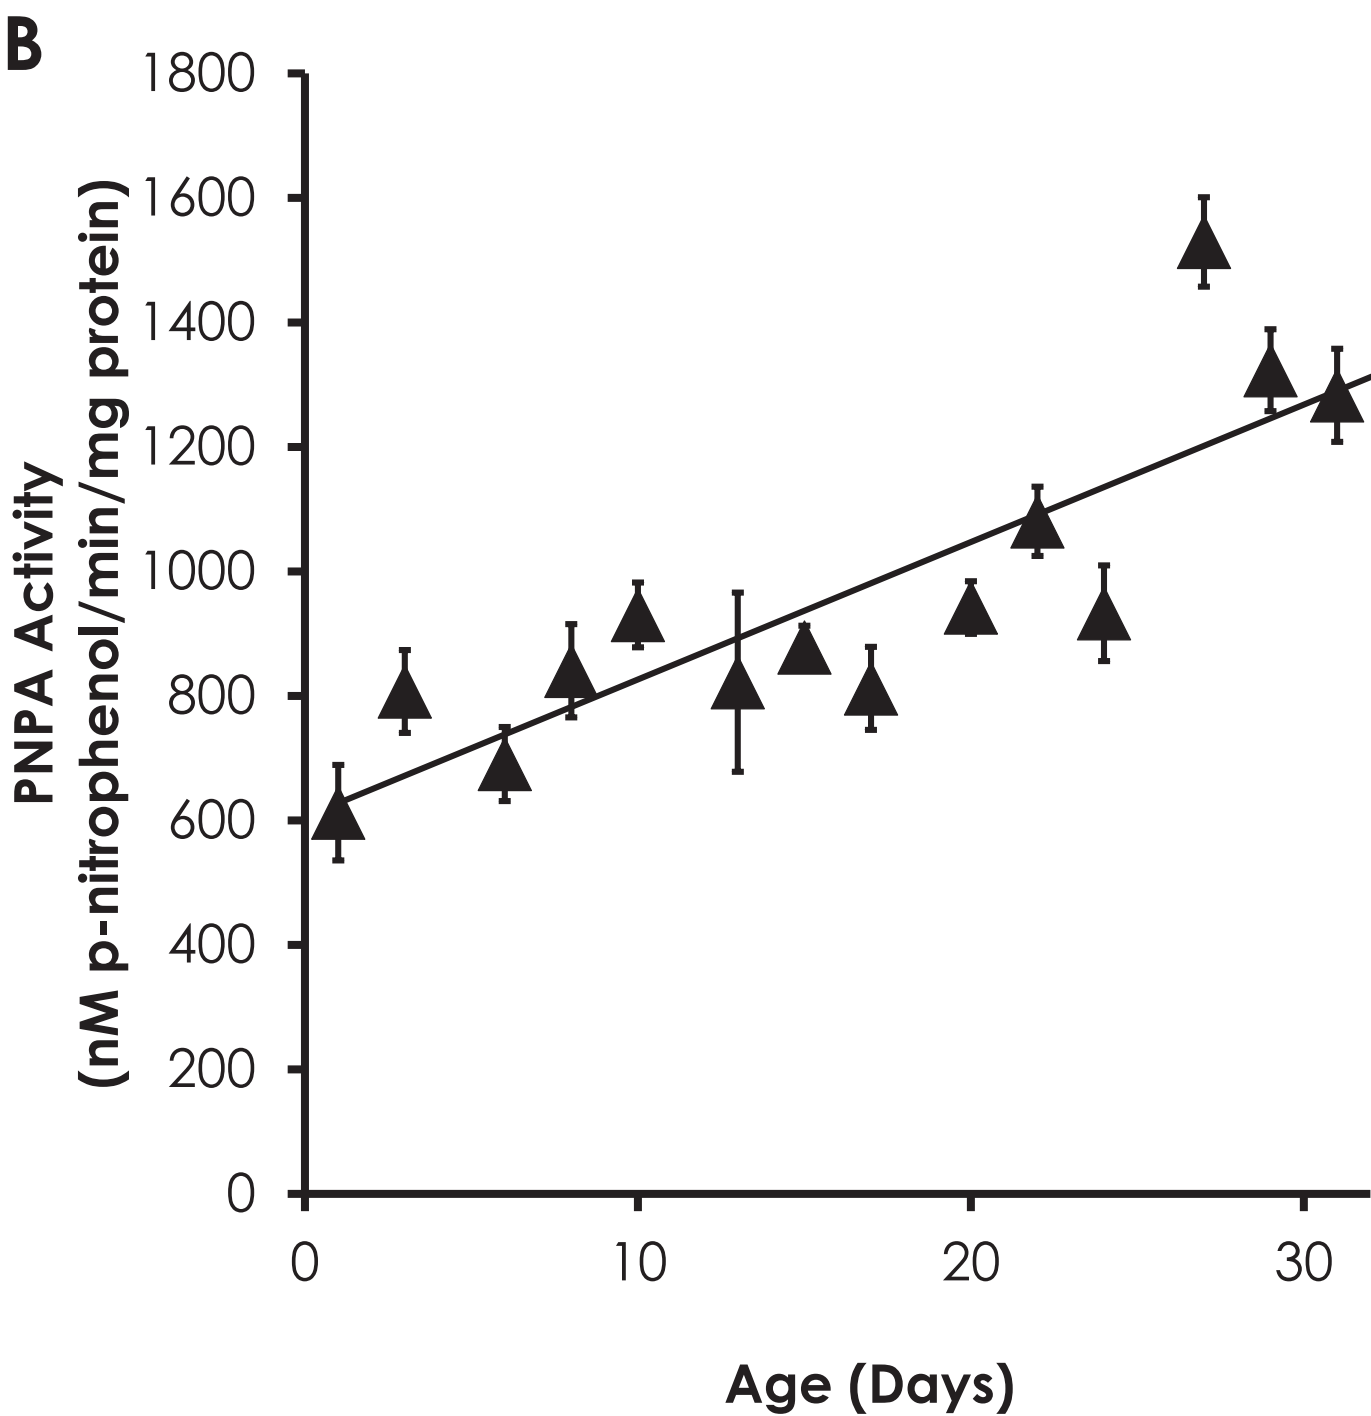

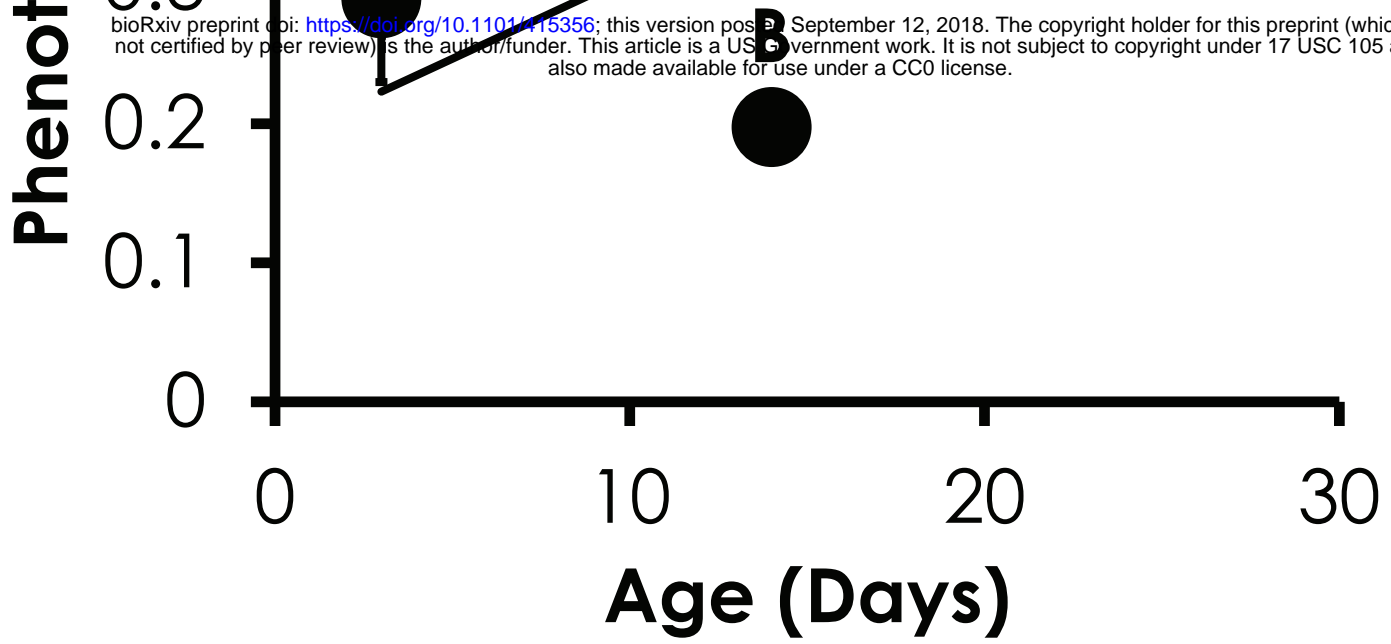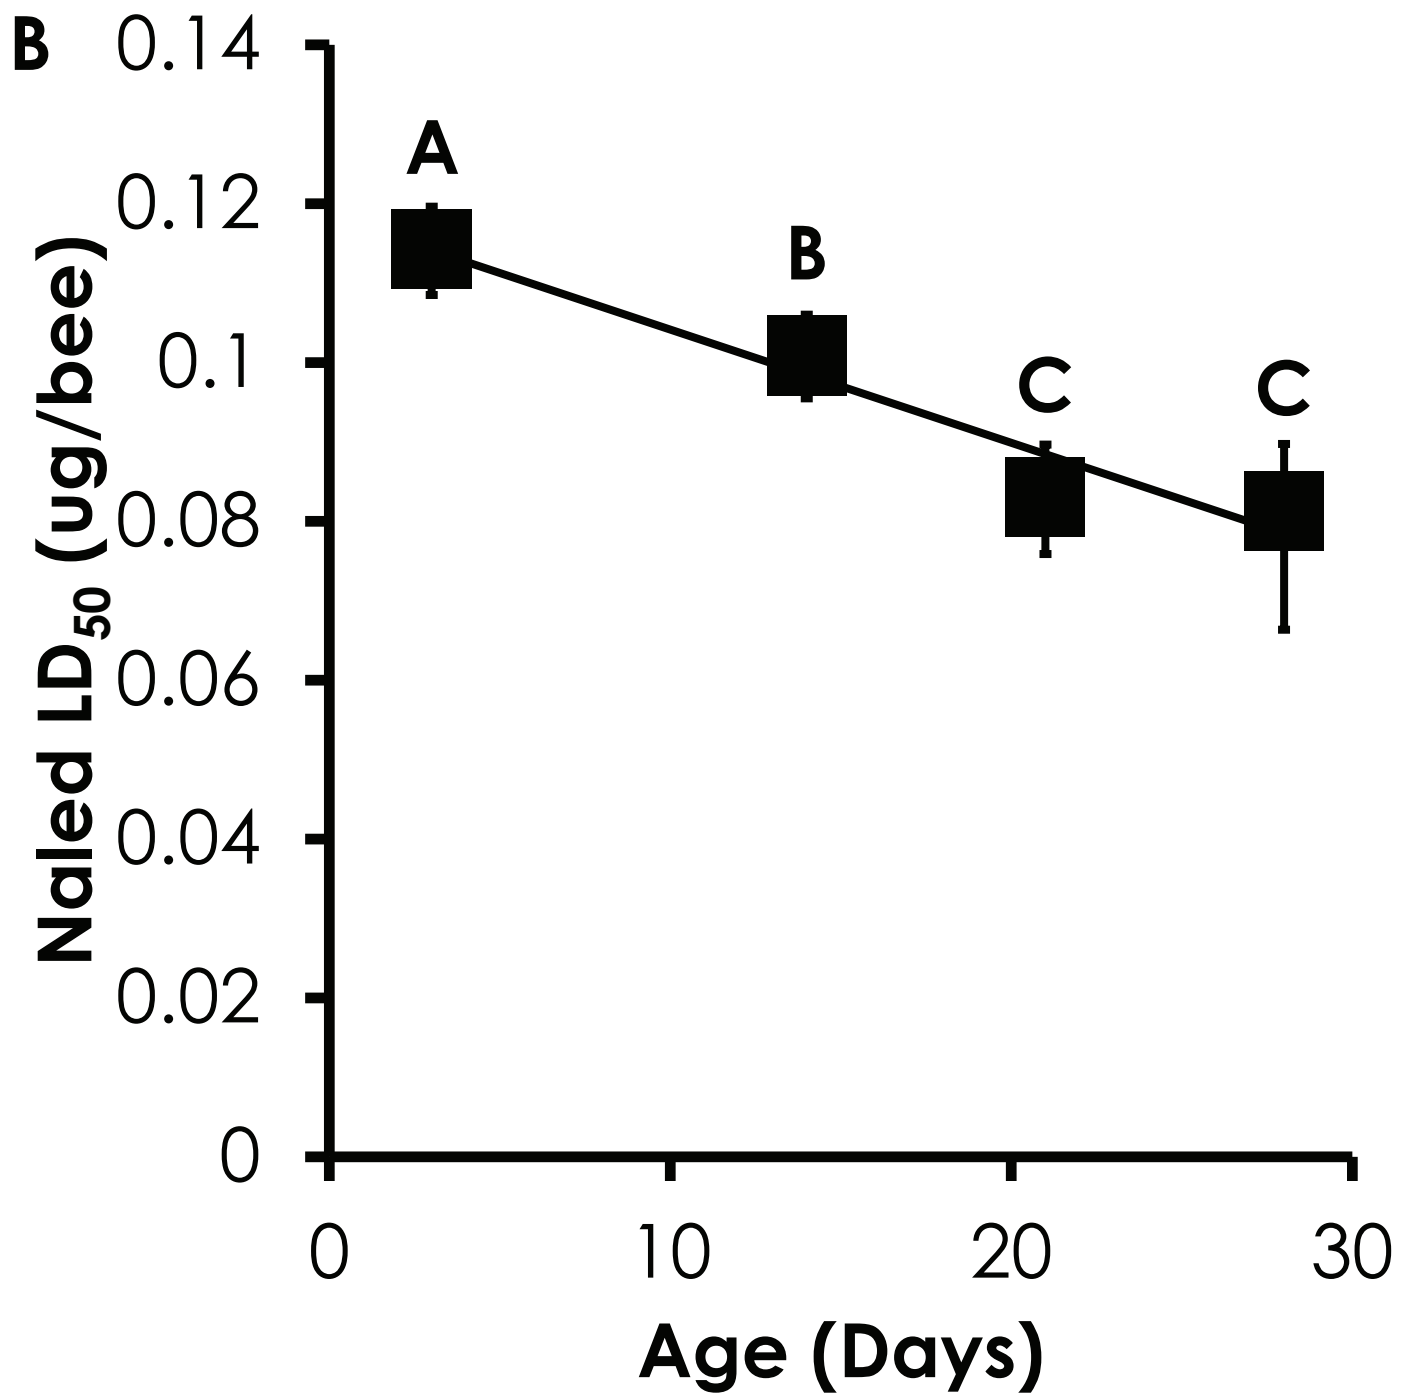

# PNPA

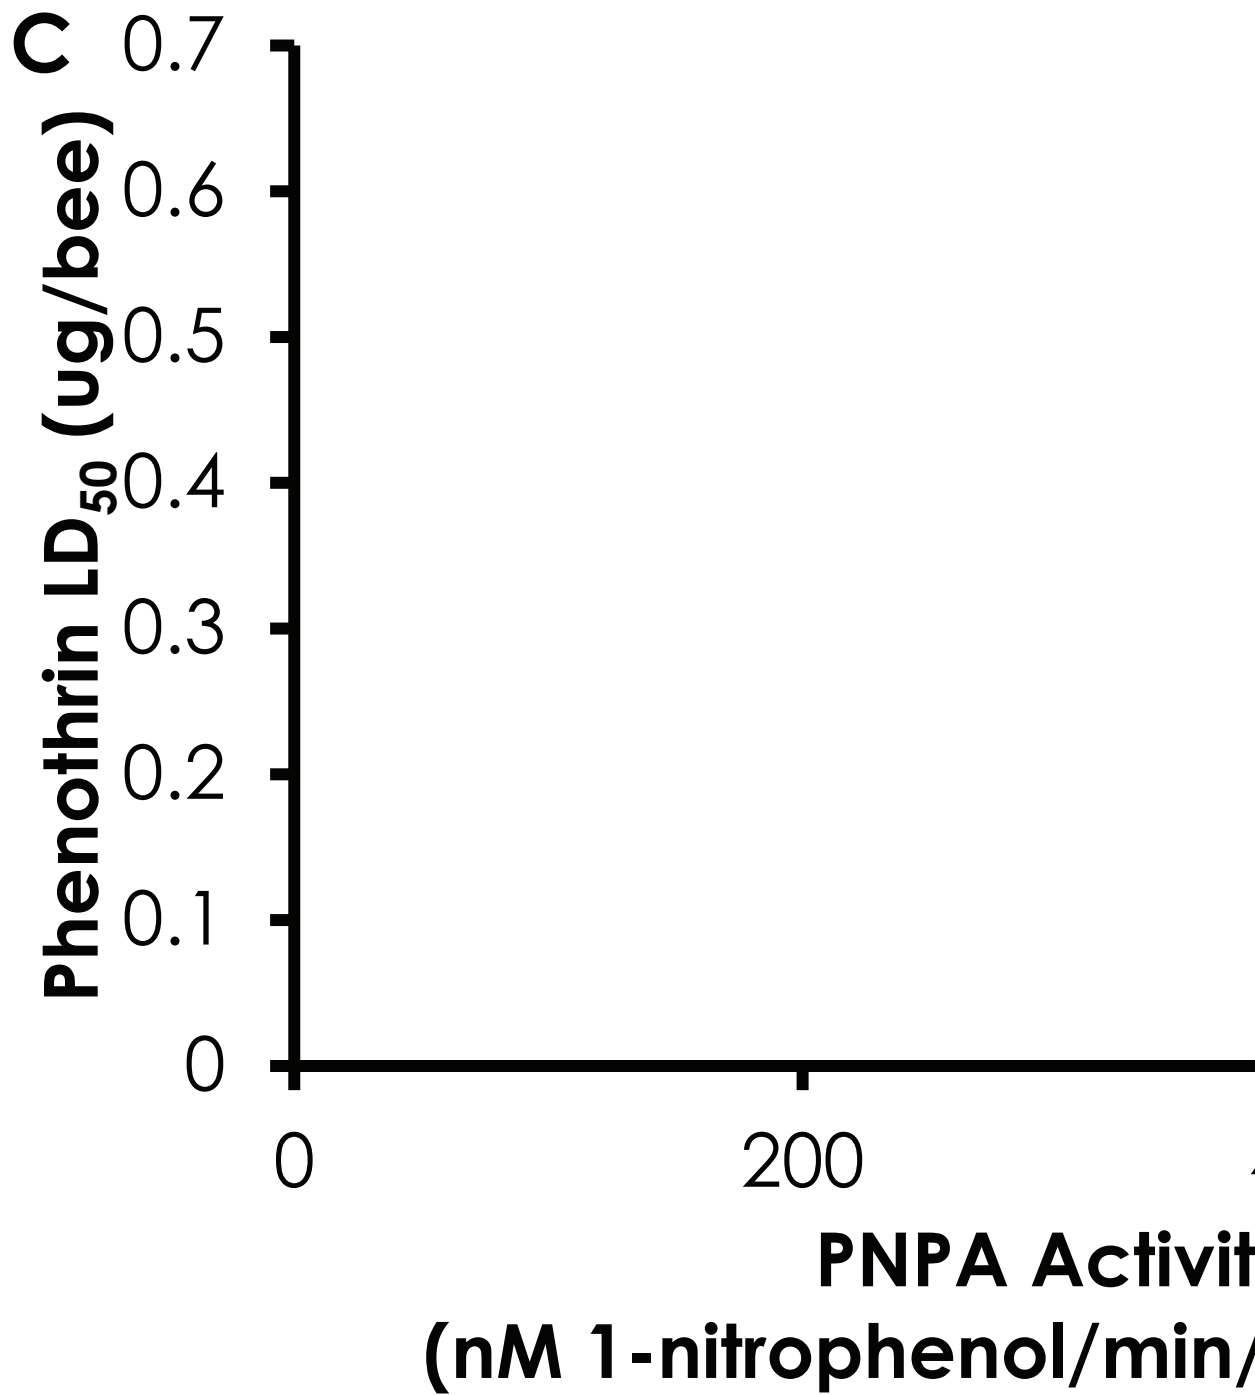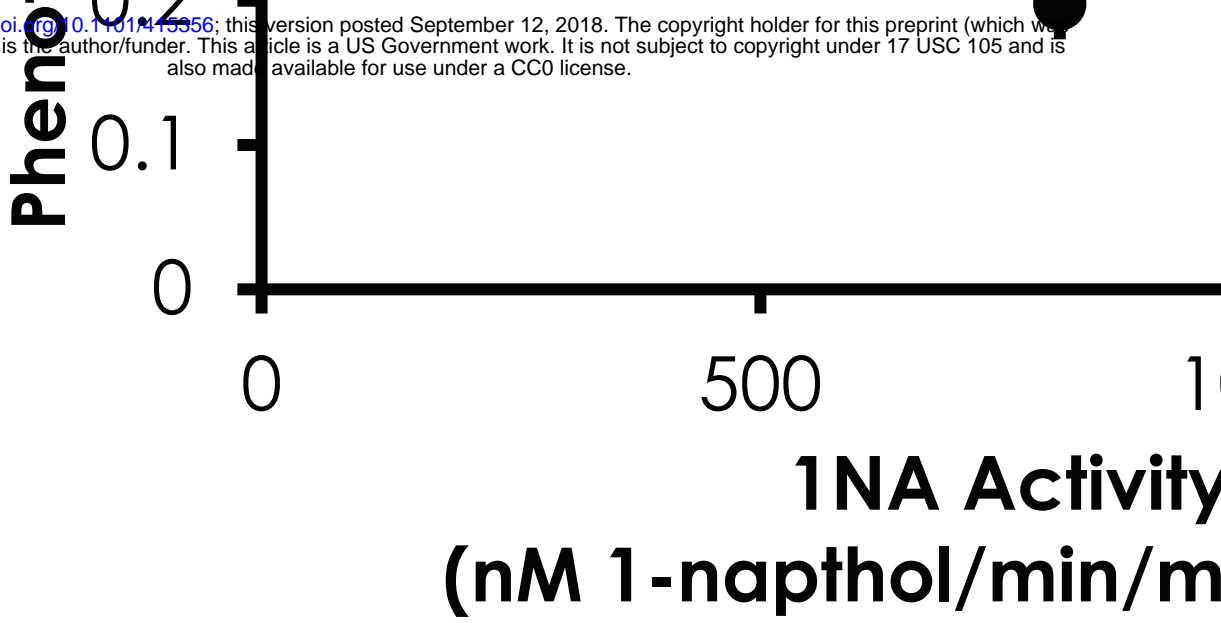

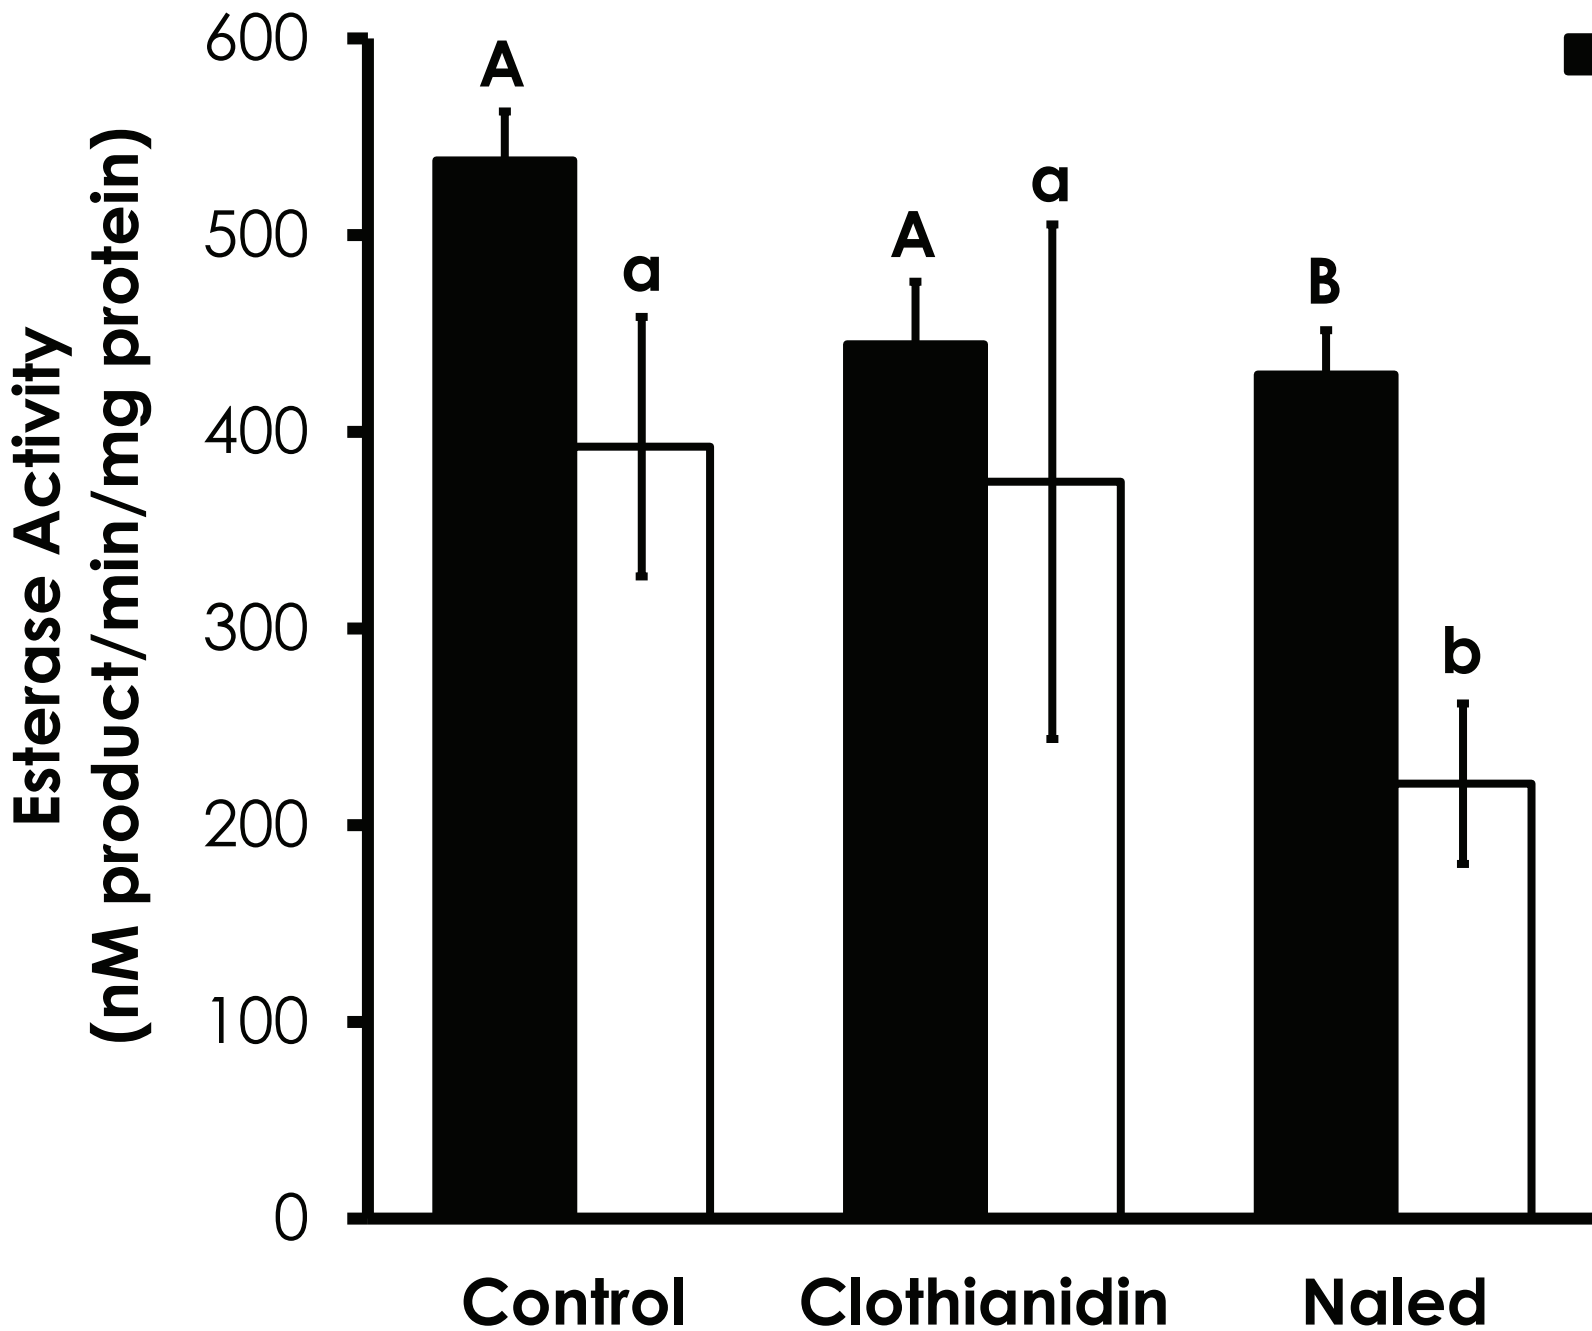

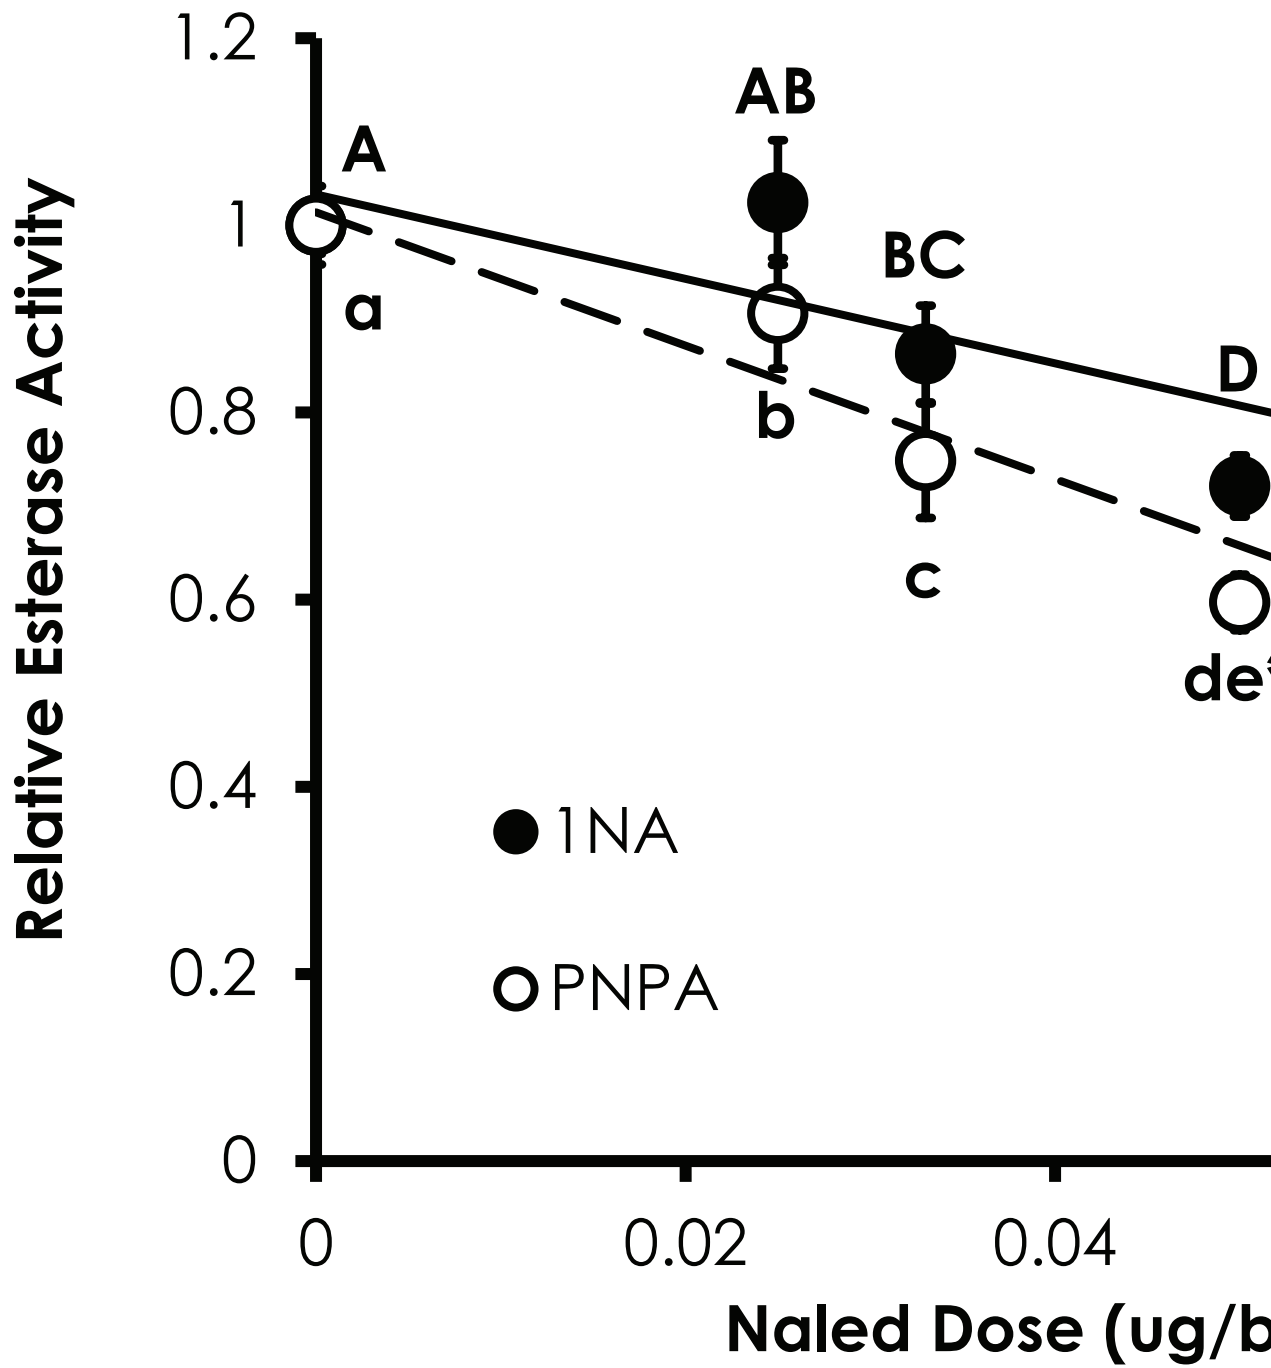

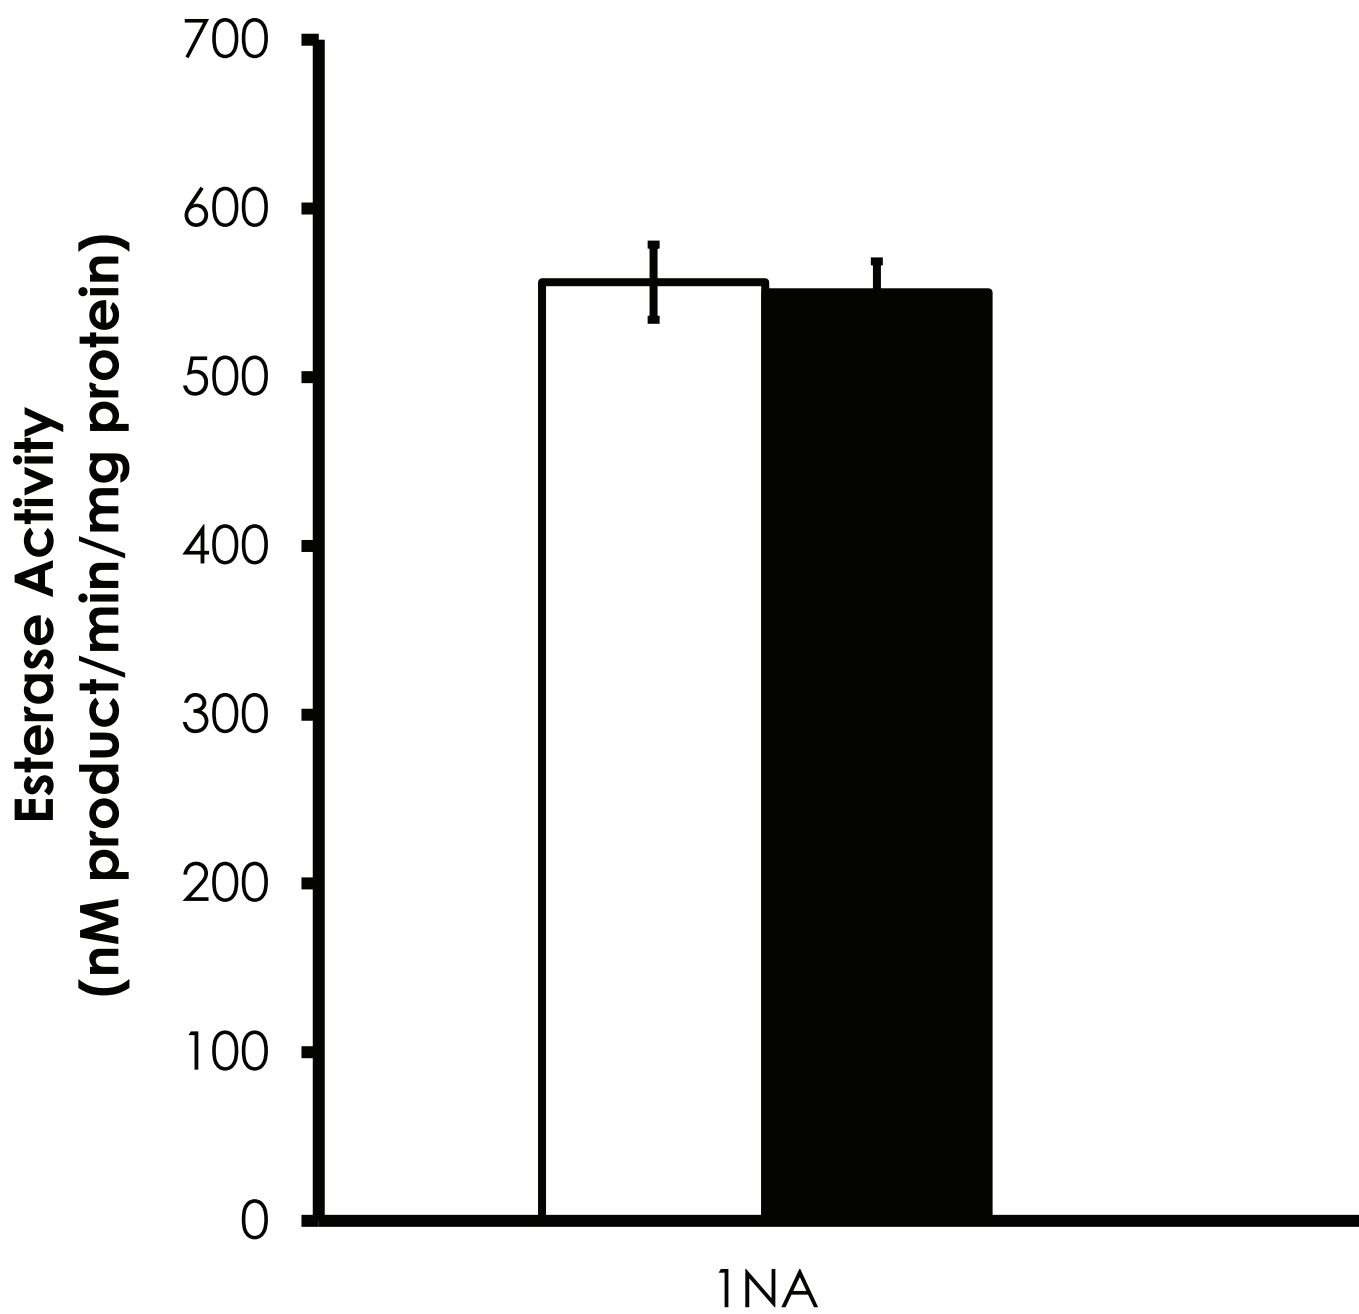



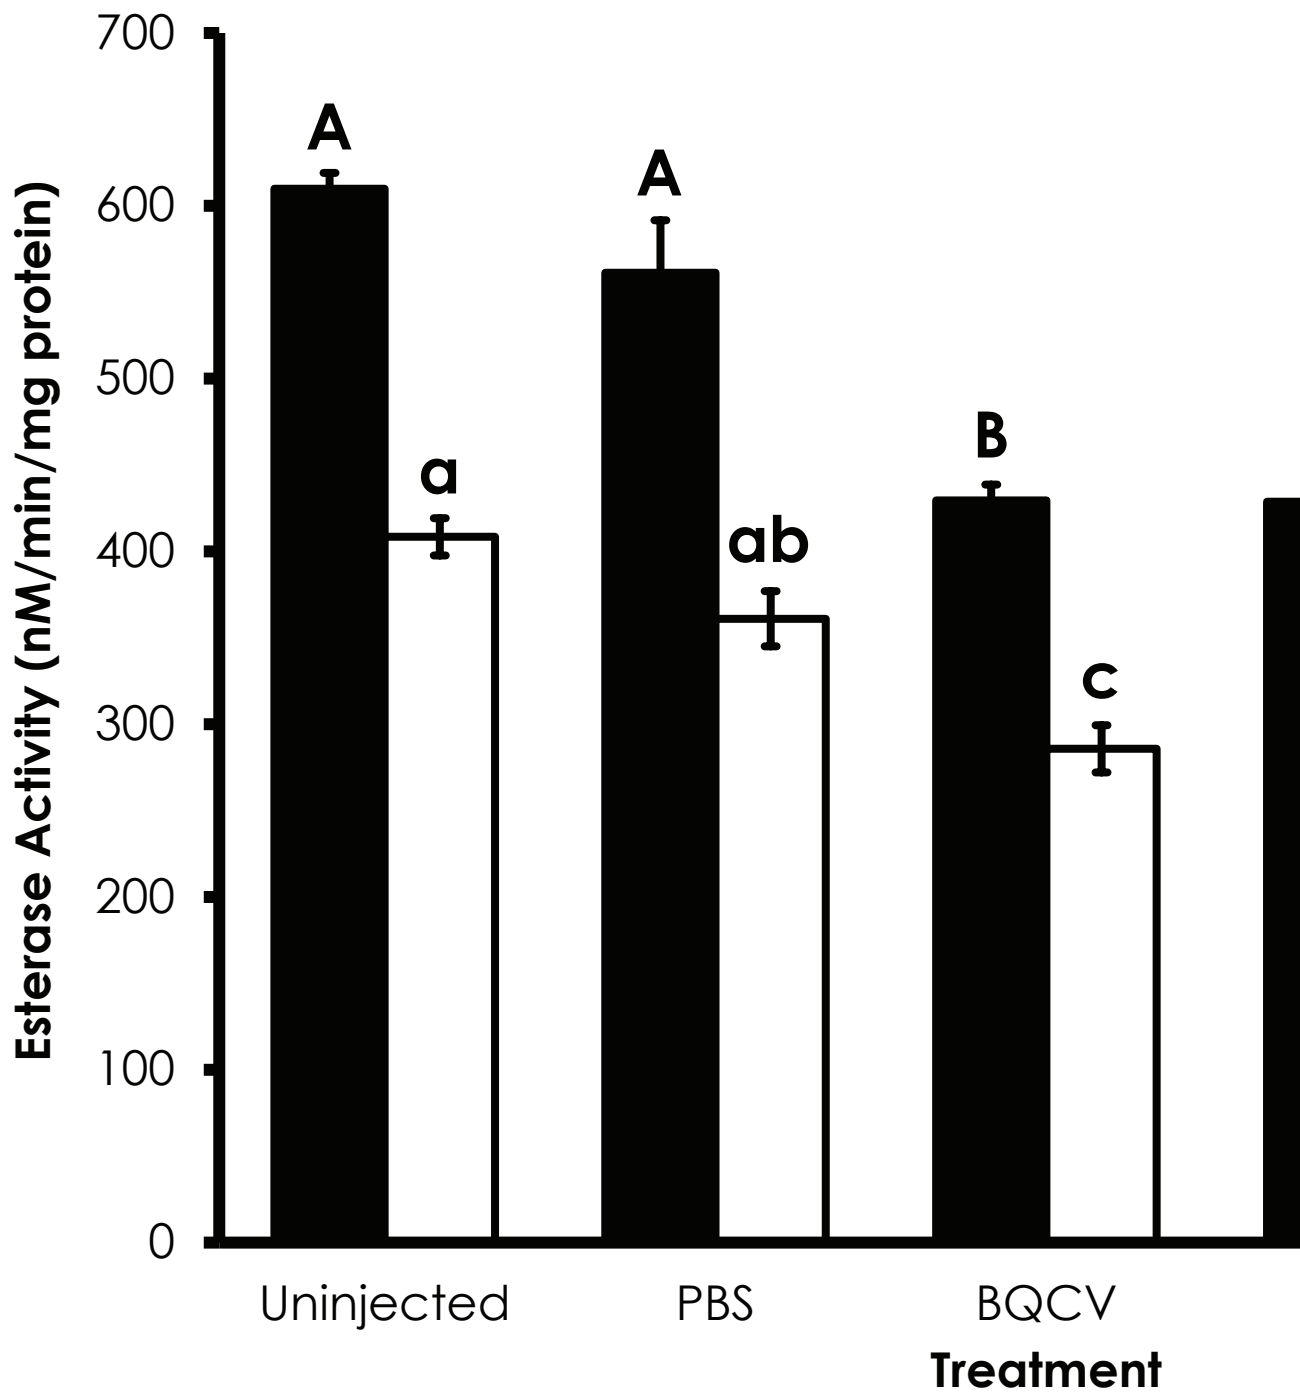

Source: http://biorxiv.org/content/10.1101/415356v1.full.pdf
